1 **Title: Exposure to parasitic protists and helminths changes the intestinal community structure of**  
2 **bacterial microbiota but not of eukaryotes in a cohort of mother-child binomial from a semi-rural**  
3 **setting in Mexico**

4 Running title: Parasites affect intestinal microbiome

5 Oswaldo Partida-Rodriguez<sup>1,2</sup>, Miriam Nieves-Ramirez<sup>1,2</sup>, Isabelle Laforest-Lapointe<sup>3,4</sup>, Eric Brown<sup>2</sup>,  
6 Laura Parfrey<sup>5,6</sup>, Lisa Reynolds<sup>2</sup>, Alicia Valadez-Salazar<sup>1</sup>, Lisa Thorson<sup>2</sup>, Patricia Morán<sup>1</sup>, Enrique  
7 Gonzalez<sup>1</sup>, Edgar Rascon<sup>1</sup>, Ulises Magaña<sup>1</sup>, Eric Hernandez<sup>1</sup>, Liliana Rojas-V<sup>1</sup>, Javier Torres<sup>7</sup>, Marie  
8 Claire Arrieta<sup>2,3,4\*</sup>, Cecilia Ximenez<sup>1\*#</sup>, Brett Finlay<sup>2,8,9\*</sup>

9 \* Senior authors, contributed equally.

10 <sup>1</sup>Laboratorio de Inmunología del Departamento de Medicina Experimental, UNAM, Mexico City, Mexico

11 <sup>2</sup>Michael Smith Laboratories, Department of Microbiology & Immunology, University of British  
12 Columbia, Vancouver, British Columbia, Canada

13 <sup>3</sup>Department of Physiology & Pharmacology, University of Calgary, Calgary, Alberta, Canada

14 <sup>4</sup>Department of Pediatrics, University of Calgary, Calgary, Alberta, Canada

15 <sup>5</sup>Department of Zoology, University of British Columbia, Vancouver, British Columbia, Canada

16 <sup>6</sup>Department of Botany, University of British Columbia, Vancouver, British Columbia, Canada

17 <sup>7</sup>Unidad de Investigación en Enfermedades Infecciosas, UMAE Pediatría, IMSS, Mexico City, Mexico

18 <sup>8</sup>Department of Biochemistry and Molecular Biology, University of British Columbia, Vancouver, British  
19 Columbia, Canada

20 <sup>9</sup>Department of Microbiology and Immunology, University of British Columbia, Vancouver, British  
21 Columbia, Canada

22

23 Corresponding author: Cecilia Ximenez, email: [cximenez@unam.mx](mailto:cximenez@unam.mx)

24

25 **ABSTRACT**

26           Around 3.5 billion people are colonized by intestinal parasites worldwide. Intestinal parasitic  
27 eukaryotes interact not only with the host, but also with the intestinal microbiota. In this work, we studied  
28 the relationship between the presence of multiple enteric parasites and the community structure of the  
29 bacterial and eukaryote intestinal microbiota in an asymptomatic cohort of mother-child binomials from a  
30 semi-rural community in Mexico. The intestinal parasites identified were *Blastocystis hominis*, *Entamoeba*  
31 *histolytica/dispar*, *Endolimax nana*, *Chilomastix mesnili*, *Iodamoeba butshlii*, *Entamoeba coli*,  
32 *Hymenolepis nana* and *Ascaris lumbricoides*. We sequenced bacterial 16S rDNA and eukaryotic 18S  
33 rDNA in fecal samples of 46 mothers and their respective children, with ages ranging from two to twenty  
34 months. Although we did not find significant alpha-diversity changes, we found a significant effect of  
35 parasite exposure on bacterial beta-diversity, which explained between 5.2% and 15.0% of the variation of  
36 the bacterial community structure. Additionally, exposure to parasites was associated with significant  
37 changes in relative abundances of bacterial taxa, characterized by increases in the Clostridia and decreased  
38 Actinobacteria and Bacteroidia abundances. There were no significant changes of intestinal  
39 microeukaryote abundances associated with parasite exposure. However, we found several significant  
40 positive correlations between intestinal bacteria and eukaryotes, including co-occurrence of the fungi  
41 *Candida tropicalis* with *Bacteroides* and Actinomyces, and Saccharomycetales with *Bifidobacterium* and  
42 *Prevotella copri*. These bacterial community structure changes associated with parasite exposure imply  
43 effects on microbial metabolic routes, host nutrient uptake abilities and intestinal immunity regulation in  
44 host-parasite interactions.

45

46

47 **IMPORTANCE**

48           The impact of intestinal eukaryotes on the prokaryotic microbiome composition of asymptomatic  
49 carriers has not been extensively explored, especially in children and in hosts with multiple parasites. In  
50 this work, we studied the relationship between protist and helminth parasite colonization and intestinal  
51 microbiota structure in an asymptomatic population of mother-child binomials from the semi-rural  
52 community of Morelos in Mexico. We found that the presence of parasitic eukaryotes correlated with  
53 changes in the bacterial community structure in the intestinal microbiota in an age-dependent way. This  
54 was characterized by an increase of the relative abundance of the class Clostridia and the decrease of  
55 Actinobacteria and Bacteroidia. While there were no significant associations between the presence of  
56 parasites and microeukaryote community structure, we observed strong positive correlations between  
57 bacterial and eukaryote taxa, identifying novel relationships between prokaryotes and fungi, and reflecting  
58 the diet of the human population studied.

59

60

61 **KEY WORDS**

62 Parasites/Eukaryotes/Protists/Helminths/Microbiota/Bacteria/16S sequencing/18S  
63 sequencing/Children/Mexico

64

## 65 INTRODUCTION

66 Bacteria, viruses, archaea, fungi and protists inhabiting the mucosal surfaces of the human body  
67 have coevolved with the human intestine for millions of years and have broad effects on host metabolism  
68 and immunity. Under natural conditions, the diverse intestinal bacterial community shares their habitat  
69 with a dynamic community of eukaryotes, many of which are well-known parasites. Their interaction can  
70 affect the success of parasite colonization, influencing its outcome along the entire parasitism-mutualism  
71 spectrum (1), affecting multiple physiological processes, including metabolism, and normal development  
72 and function of the mucosal and systemic immune system (2-10).

73 The influence of intestinal parasites in resident bacterial and eukaryotic community structures has  
74 not been fully addressed. Some of the previous studies have been performed in experimental models of  
75 disease (10). Even though parasites colonize millions of people around the world, very frequently the  
76 damage caused by parasitic colonization is either controlled by the host or by both parasite and host,  
77 generating an asymptomatic colonization. Thus, the study of how parasites influence intestinal microbiota  
78 in asymptomatic individuals is an important and a relevant topic, especially given the large effect the  
79 microbiome can have on the host.

80 Little is known about the eukaryotic microbiome or eukaryome, and virtually nothing is known  
81 about its community structure, particularly in the case of protist colonisations. Morton et al. (5) found a  
82 strong association of the presence of *Entamoeba* with a higher frequency of Firmicutes and a lower  
83 frequency of *Bacteroidetes* in *E. histolytica*-positive samples. Nieves-Ramirez et al. (11), working in the  
84 same semi-rural Mexican population that is used in this study, found that asymptomatic colonization with  
85 the protist *Blastocystis* in adults was strongly associated with an increase in alpha- and beta-diversities of  
86 bacteria, and with more discrete changes in the microbial eukaryome.

87 It has already been widely documented that the initial development of intestinal microbiota in  
88 children has a profound effect on adult intestinal health and disease (12-16). The first 1,000 days of life  
89 play an important role in determining the phylogenetic structure of adult human gut microbiota (16) and

90 early postnatal exposures to challenges, such as parasite exposure, could directly affect development of the  
91 gut microbiota structure. Given our lack of knowledge on the role of eukaryotes in the establishment of the  
92 early life microbiota, we aimed to study this in a population of 46 mother-child asymptomatic binomials  
93 from a semi-rural Mexican population with high levels of intestinal parasite exposure.

94 In this work, a comprehensive microbiome assessment was performed using 16S ribosomal DNA  
95 (rDNA) and 18S rDNA Illumina sequencing analysis for the characterization of bacteria and eukaryotes in  
96 the fecal microbiome Alpha and beta diversity, and bacterial relative abundance were determined and  
97 correlations between the parasite-positive and negative data sets revealed interesting associations between  
98 parasite colonization and distinct microbiome patterns in the intestine of children under two years of age.

99

## 100 RESULTS

### 101 Demographics

102 A Mother-Child (M-C) binomials cohort, which included parasite-positive individuals (23 M and  
103 11 C), parasite-negative individuals (23 M and 23 C) and 12 children exposed to parasites (negative  
104 children with positive mothers) was studied (Table 1). The ages of the children ranged from two to twenty  
105 months (average of 11.04 months). Children were breast fed for an average of 11.2 months (2-20 months),  
106 with a significantly lower breast-feeding length in the parasite-positive (10 months) when compared to  
107 parasite-negative ones (12.43 months,  $p=0.0406$ ). Twelve children were delivered by C-section and 34  
108 through vaginal birth. All individuals were within a healthy weight range and did not show any stunting or  
109 wasting. Mother's age average was 27.4 years old with a range of (18-47 years old). The mothers of  
110 parasite-positive children were significantly younger (25.3 years old) in comparison with the mothers of  
111 parasite-negative children (29.5 years old,  $p=0.0196$ ). None of the participants reported antibiotic use,  
112 gastrointestinal symptoms (according to Rome III questionnaire), nor inflammatory signs and symptoms  
113 (according to medical examination) in the 6 months prior to sampling.

114

### 115 Parasites found in mother-child binomials

116 Intestinal parasites found either by microscopy or qPCR in feces of mothers and children included  
117 *Blastocystis hominis*, *Entamoeba coli*, *Entamoeba histolytica/dispar*, *Endolimax nana*, *Iodamoeba*  
118 *butshlii*, *Giardia duodenalis*, *Chilomastix mesnili*, *Hymenolepis nana* and *Ascaris lumbricoides* (Fig. 1).  
119 The most frequently found parasite was *B. hominis*, present in 32.6% of positive mothers and in 8.7% of  
120 children, followed by *E. coli* (M=23.9% and C= 8.7%). In the mothers, it was also common to find *E.*  
121 *histolytica/dispar* (10.8%), *E. nana* (10.8%), and *H. nana* (6.5%). In the children, *A. lumbricoides* was  
122 present in 8.7% of the positive samples. We also found several co-colonisations by two or more intestinal  
123 parasites particularly in the mothers, being *B. hominis-E. coli* the most frequently found (M=10.8% and  
124 C=2.2%). None of the parasite-positive individuals reported gastrointestinal symptoms.

125

126 **Bacterial and eukaryotic diversity in individuals colonized by protists**

127 *Binome identity*

128 We determined the fecal bacterial and eukaryotic composition of the 46 binomials. In order to  
129 evaluate if the mother's intestinal microbiota composition could be a variation driver of the intestinal  
130 microbiota in children, we evaluated the binome identity on the beta-diversity by permutational  
131 multivariate analysis of variance (PERMANOVA) (11) on Bray-Curtis distances of bacteria and  
132 eukaryotes among mothers and their children. There were no observed significant effects of binome  
133 identity on the variation of either the bacterial or the eukaryote community structures in this group of  
134 individuals (Fig. S1).

135

136 Effects in children (less than five months old)

137 Due to the known differences in microbiome structure and diversity explained by temporal changes  
138 during the first year of human life (18), and that we observed a clear impact of age in the intestinal  
139 microbiota distribution due to age, we evaluated the effect of parasites in children under or over 1 year of  
140 age separately. For children under 1 year of age, which in this cohort were all under 5 months of age, we  
141 identified relationships between bacterial community structure and parasite exposure by conducting a  
142 PERMANOVA on the community matrix. We did not find any parasites among children younger than 5-  
143 months-old, but we considered them as parasite-exposed when their mothers tested positive for parasites.  
144 Based on Bray-Curtis dissimilarities (Fig. 2), we found that the community structure of bacteria was  
145 significantly related to parasite exposure (PERMANOVA,  $p=0.003$ ). According to the PERMANOVA  
146 analysis, parasite exposure explained 15% of the variation in bacteria beta-diversity (Fig. 2a), however, we  
147 did not find an effect of parasite exposure on eukaryote community structure (Fig. 2b). We also calculated  
148 the Shannon diversity index and Chao1 estimated richness of bacterial and eukaryotic communities in this

149 group of children and we did not find any statistically significant differences between the individuals  
150 exposed vs non-exposed to parasites (Fig. 2c, d, e, and f).

151

152 Children older than one year old

153 In children older than one year old, we found a significant effect of parasite presence on bacterial  
154 beta-diversity (Fig. 3a), which explained 5.2% of the variation present in this group. We also observed a  
155 significant effect of child age on both bacterial ( $p < 0.001$ ) (Fig. 3a) and eukaryote ( $p < 0.001$ ) (Fig. 3b) beta-  
156 diversities, explaining the variation found in 6.7% and 4.3%, respectively. Chao1 estimated richness in this  
157 group shown a significant increase of bacterial diversity ( $p = 0.04$ ) in the presence of intestinal parasites but  
158 not in the eukaryotic diversity (Fig. 3e). There were no statistically significant differences on Shannon  
159 diversity in bacteria and eukaryotes between parasite positive and negative children in this group of age  
160 (Fig. 3c and d), suggesting that changes in alpha-diversity are mainly due to effect on operational  
161 taxonomic unit (OTU) richness.

162

163 Children from one to two years old

164 In older children, between one and two years old, we detected an effect of parasite presence on  
165 bacterial community structure (Fig. 4). The parasite exposure explained 8.7% of the bacterial variation  
166 whereas age explained 7.7% (Fig. 4a). Chao1 and Shannon diversity indices showed no changes in  
167 richness or evenness (Figure 4c and e). Although there was no significant effect detected on eukaryotic  
168 beta-diversity (Figure 4b) and on eukaryotic Chao1 richness (Fig. 4f), eukaryote alpha-diversity (Shannon  
169 index) showed a statistically significant increase in the group colonized by parasites (Fig. 4d).

170 In mothers, we also found a significant effect of parasite exposure on bacterial beta-diversity (Fig.  
171 5a), explaining 5.6% of the variation of community structure, and no effect over the eukaryotic diversity  
172 (Fig. 5b). No statistically significant effects were observed in mothers exposed to parasite in bacterial and  
173 eukaryote community richness and alpha-diversity (Fig. 5c, d, e and f).



174

## 175 **Relative abundance of bacterial classes**

176 Differential abundance analysis revealed changes in bacterial composition associated with parasite  
177 colonization and exposure (Fig. 6). In babies less than five months old exposed to parasites, the most  
178 abundant groups at the genus level were *Bifidobacterium* and *Bacteroides* (Fig. 6a). In this group of  
179 children, the genera *Pseudoramibacter*, *Eubacterium*, *Prevotella* and *Oscillospira* were reduced in their  
180 relative abundance compared to parasite exposure.

181 In children older than one year, children from one to two years old and in the mothers, the most  
182 abundant classes were Bacteroidia, Actinobacteria, Clostridia and Coriobacteria, and the presence of  
183 parasites was consistently associated with an increase of the relative abundance of Clostridia and a  
184 decrease of Actinobacteria and Bacteroidia (Fig. 6b, c and d). There was also a decrease of Fusobacteria  
185 and Gammaproteobacteria percentages associated with the colonization of parasites in the children from  
186 one to two years old and in the mothers, respectively.

187

## 188 **Bacterial-Eukaryote correlations**

189 In order to study correlations between the presence of bacterial and eukaryotic taxa, independently  
190 of the parasite exposure, we created heatmaps of biweight correlations between the top 50 bacterial taxon  
191 operational taxonomic units (OTUs) and the top 50 eukaryote OTUs in fecal samples. In babies less than  
192 five months of age, we found several statistically significant correlations between bacterial and eukaryote  
193 taxa (Fig. 7). We found positive correlations of bacteria with fungi: *Bacteroides* with *Candida tropicalis*,  
194 Eurotiales and *Hanseniaspora uvarum*; *Bacteroides fragilis* with Eurotiales and *Hanseniaspora uvarum*;  
195 Lachnospiraceae with Eurotiales and *Hanseniaspora uvarum*; Coriobacteraceae with Eurotiales and  
196 *Hanseniaspora uvarum*; *Oscillospira* with Nuclemycea, *Pichia kudinaevii*, Eurotiales, and  
197 *Hanseniaspora uvarum*; Actinomyces with *Candida tropicalis*; and *Bifidobacterium* with  
198 Saccharomycetales. We also found positive correlations of *Bacteroides*, *Bacteroides fragilis*,

199 Lachnospiraceae, Coriobacteraceae and *Oscillospira* with the protist *Heteromita*. In children older than  
200 one year old and in the mothers, there were less correlations between bacterial and eukaryote taxa (Fig. 8).  
201 We found positive correlations of *Prevotella copri* with *Saccharomyces*.

202

## 203 DISCUSSION

204 The most recent reports available estimate that 3.5 billion people are colonized by parasites around  
205 the globe (19, 20). Even though eukaryotes are in much lower abundance than bacteria, it has been  
206 demonstrated that mono-colonization of parasites is associated with intestinal microbiota composition  
207 changes (5, 11, 21-24). Colonization by parasitic eukaryotes usually does not follow a one host–one  
208 parasite model (25-29), and very few studies have assessed the intestinal microbiota composition when  
209 multiple parasites are present (30). In this project, we studied whether the exposure to intestinal parasites  
210 in an asymptomatic cohort of mother-child binomials from semi-rural community in Mexico is related to  
211 changes to the bacterial and eukaryotic intestinal microbiota. Asymptomatic cohorts are a crucial setting to  
212 study this research question, given that the inflammatory response in symptomatic parasitosis can  
213 confound the ecological effect of the presence of parasites in the human gut. Our study revealed important  
214 changes in bacterial intestinal microbiota relative abundances associated with the exposure to parasites,  
215 characterized by the increase of the abundance of the taxa Clostridia and the decrease of Actinobacteria  
216 and Bacteroidia, with no important changes in alpha-diversity indices.

217 We found nine different parasites in the binomials studied, predominated by the protists  
218 *Blastocystis hominis* (20.6%), *Entamoeba coli* (16.3%), *Endolimax nana* (6.5%) and *Entamoeba*  
219 *histolytica/dispar* (5.4%) and the two helminths *Ascaris lumbricoides* (5.4%) and *Hymenolepis nana*  
220 (4.3%). More than half of the exposed individuals (54.8%) were colonized by two or more different  
221 parasites, yet, all parasite-positive individuals in our cohort remain asymptomatic. Interestingly, when  
222 parasite positive individuals were compared with parasite-negative ones, we found that the parasite-  
223 positive children were breast-fed for a significantly shorter time and that the mothers of parasite-positive  
224 children were significantly younger. Even though we did not find parasite colonization in the children  
225 younger than 5-months-old, these infants are constantly exposed to the microbiome of their parasite-  
226 positive mothers. These exposures originate from birth, breastfeeding, and spending the majority of the  
227 time together (31). It remains unclear why infants at this age do not become colonized by parasites, but our

228 data clearly indicates that even in the absence of colonization, there are distinct microbiome patterns  
229 associated with maternal colonization. These results suggest that bacterial microbiome differences  
230 originating from parasite colonization are inheritable and independent of colonization per se.

231 The mother's microbiota has been determined as an important microbial source during early  
232 colonization of the infant gut in industrialized settings (13, 31-33), however, we found no binome identity  
233 effect either in bacterial or in eukaryote communities. This may be due to the fact that the majority of the  
234 abovementioned studies compared infant samples collected shortly after birth. The samples analyzed in  
235 this study were of older infants. However, it is also possible that the increased dissimilarity between  
236 mother-infant binomes in this study may reflect a bigger influence of other external environmental factors  
237 on infant microbiome structure in this semi-industrialized setting.

238 Our study detected an increase of the bacterial and eukaryotic richness and alpha-diversity due to  
239 parasite colonization only in children over 1 year. Previous reports have associated colonization with  
240 parasites with a higher intestinal bacterial diversity. The study by Morton et al. (5) in rural populations in  
241 Cameroon found that the presence of the protist *Entamoeba* was associated with a significant increase in  
242 alpha (intra-host) diversity. Furthermore, a recent study by our group (11) found a dramatic increase of the  
243 bacterial richness and alpha-diversity in people colonized by *Blastocystis* from the same community as the  
244 present study. The discrepancies between this study and previous ones, which did not include infants under  
245 1 year, strongly suggest that the effect of parasite exposure on alpha-diversity is age-dependent, and may  
246 be attributable to the lower alpha-diversity in infant samples. This is further supported by a recent study in  
247 children from Colombia (30), in which no differences in bacteria alpha-diversity in children positive to  
248 parasites were reported either. However, we did not observe an increase in alpha-diversity in the parasite-  
249 positive mothers either, suggesting that other factors may be at play, like the common multiparasitic  
250 colonization in this settings that may lead to more complex interactions with the resident microbiota,  
251 which may only be detected in a much larger study population size.

252 Despite the discrepancies with other studies in relation to alpha-diversity, we found that the  
253 parasite exposure was significantly associated with the bacterial intestinal microbiota beta-diversity in  
254 both infants and mothers in this study yet not with the eukaryotic microbiota. In children younger than 5  
255 months old, the parasite exposure explained 14.9% ( $p=0.003$ ) of the variation in bacterial community  
256 structure, whereas in the older groups of infants and mothers parasite exposure explained less of an effect  
257 in beta-diversity. This suggests that while parasite exposure is an important factor shaping bacterial  
258 intestinal beta-diversity, its effects are more evident during the earlier stages of gut bacterial community  
259 establishment.

260 Exposure to parasites was also associated with changes in specific taxa, including an increase of  
261 bacterial class Clostridia and a decrease of class Bacteroidia. This result agrees with the study by Morton  
262 et al. (5), in which there was a strong correlation of *Entamoeba* with higher frequency of Firmicutes  
263 (particularly the Clostridia class) and a lower frequency of Bacteroidetes (mostly *Prevotella*) in *E.*  
264 *histolytica*-positive samples. In the study focused on *Blastocystis* (11), there was also a significant increase  
265 of the genera *Ruminococcus* and *Oscillospira* (members of the Clostridia class) and a reduction of the  
266 genus *Prevotella* (Bacteroidia class) in colonized individuals.

267 There are a several mechanisms possibly responsible for the observed changes in relative  
268 abundance. Direct parasite-bacteria interactions driven by competition for resources, predation or  
269 production of molecules may affect the fitness and survival of microorganisms involved (1). Protists are  
270 well-known bacterivores. *Entamoeba* and *Blastocystis* can graze on bacteria (34, 35), and their ability to  
271 feed on the bacteria is an important mechanism for top down control of bacterial communities due to their  
272 high feeding rates (36). It has also been recently reported that *Trichuris muris*, a nematode from the mouse  
273 gut, acquires its own intestinal microbiota from the mouse intestine, very likely through ingestion (37).  
274 Furthermore, the mechanisms by which bacteria avoid protists predation changes their ability to survive  
275 and can even promote the emergence of virulence and invasion (36, 38).

276 Protists may also influence bacterial community structure in the intestine through indirect  
277 interactions with bacteria. Some parasites, like *Entamoeba* and *Giardia* who have mucolytic enzymes (39,  
278 40), and helminths like *Trichuris trichiura*, which stimulate mucin expression or express mucin-like  
279 molecules themselves (41-43), can alter the outer mucus layer changing the bacteria microenvironment  
280 and sources of nutrition for certain taxa. Additionally, the parasites may produce metabolites that could  
281 influence the regulation of the immune system, which helminths are well-known to do. *Trichuris muris*  
282 and *Heligmosomoides polygyrus bakeri* can induce the generation of Tregs (44, 45), changing the physical  
283 microenvironment by modifying the mucus and the antimicrobial peptides production, which might  
284 promote the outgrowth of specific species among the microbiota (46). Bacterial and eukaryotic taxa  
285 identified from our and other human studies should be studied in appropriate animal models to further  
286 determine mechanisms involved in these multi-kingdom interactions.

287 While exposure to parasites practically had no effect on the diversity and abundance of eukaryotes,  
288 correlation analysis detected several significant bacteria-eukaryotes positive associations. The strongest  
289 positive correlations were found between bacteria and several common fungi of the intestinal microbiota.  
290 Agonistic and antagonistic relationships have been described between intestinal fungi and bacteria (47-52).  
291 The common yeast *Candida albicans* suppressed regrowth of *Lactobacillus* and promoted the recovery of  
292 Bacteroidetes populations during antibiotic recovery (53). Our study detected co-occurrence of another  
293 *Candida* species, *Candida tropicalis*, with *Bacteroides*. Other co-occurrences between fungi and bacteria  
294 found were *Oscillospira* with *Nucleomyces*, *Pichia kudinaevii*, Eurotiales, and *Hanseniaspora uvarum*;  
295 *Actinomyces* with *Candida tropicalis*; *Bifidobacterium* with Saccharomycetales, and *Prevotella copri* with  
296 *Saccharomyces*. While correlative in nature, our analysis may also reveal the results of bacteria-fungal  
297 interactions in the human gut.

298 Our work supports previous reports that presence of intestinal parasites is linked to strong bacterial  
299 microbiota community changes. By including mother-child binomes, our work further revealed that these  
300 effects occur even in the absence of direct colonization in infants of colonized mothers, strongly

301 suggesting that the effect of parasite colonization on the microbiome may also lead to changes in the  
302 vertical transmission of bacterial taxa. This would imply that colonization by parasites may be a strong  
303 indirect factor in the inheritable features of the human gut microbiome. How these intestinal microbiota  
304 changes associated to parasites may modify the immune system and other aspects of metabolism remains  
305 to be elucidated.  
306

## 307 **MATERIALS AND METHODS**

### 308 **Study population, study design and ethical considerations**

309 Xoxocotla is a semi-rural community of the State of Morelos, Mexico, located at 120 km south of  
310 Mexico City (longitude 99°19'W, latitude 18°3'N) in a spanning area of 29,917 km<sup>2</sup> with a tropical  
311 climate (warm subhumid). Total population is 5,163 people whose main source of money income is  
312 agriculture and commerce. Sample collection was carried out between April 2011 and January 2013.  
313 In this cross-sectional study of cohorts, every volunteer mother was informed about the characteristics of  
314 the project, the objectives, and the advantages to participate, as well as the biological samples needed, the  
315 sampling procedures and possible complications that may arise. All the participant mothers signed a  
316 written informed consent letter for her child and herself prior to the sample collection. Afterwards,  
317 questionnaires to collect sociodemographic, socioeconomic and health data antecedents (Rome III for  
318 gastro-intestinal symptoms (54), nutrition, way of delivery, and antibiotic use about the 6 months prior  
319 sampling) were applied and all variables were recorded in a database. The recruited mothers were  
320 submitted to a stool microscopic analysis for detection of intestinal parasites for the construction of the  
321 parasitized and non- parasitized cohorts. Forty-six Mother-Child binomials were included in the study, and  
322 feces samples were collected in sterile plastic containers, immediately placed at 4°C for transport to the  
323 laboratory and stored at -20°C until analysis.

324 All procedures in this study fulfilled the “Reglamento de la Ley General de Salud en Materia de  
325 Investigación para la Salud” of Mexico, in particular the chapters about the ethical aspects of Research in  
326 Humans Beings, about Research in Communities, Research in minors and Research in women in fertile  
327 age and pregnant women (Diario Oficial de la Federación, febrero 1984). All methods were approved by  
328 the Ethics Committee of the Faculty of Medicine of the National Autonomous University of Mexico and  
329 research was carried out in accordance with the Declaration of Helsinki.

330

### 331 **Parasite detection in feces**



332 The presence of the main intestinal parasites historically found in Xoxocotla (*Entamoeba*  
333 *histolytica/dispar*, *Entamoeba coli*, *Blastocystis hominis*, *Iodamoeba butshlii*, *Endolimax nana*,  
334 *Chilomastix mesnili*, *Giardia intestinalis* and *Cryptosporidium parvum*) was tested in feces by microscopy.  
335 The protists that have been associated with pathogenesis (*Entamoeba histolytica*, *Blastocystis hominis*,  
336 *Giardia intestinalis* and *Cryptosporidium parvum*) were also tested by quantitative PCR (qPCR) as  
337 previously reported (11). Briefly, samples with ~50 mg of stool were mechanically lysed using Mo Bio dry  
338 bead tubes (Mo Bio Laboratories, Inc.) in a FastPrep homogenizer (FastPrep instrument; MP  
339 Biochemicals). DNA extraction was made with the Qiagen QIAamp Fast DNA Stool Mini Kit (Qiagen)  
340 following manufacturer's instructions. qPCR was performed on an Applied Biosystems 7500 machine  
341 using QuantiTect SYBR green master mix (Qiagen) in 10ul reaction mixture volumes with 6.25 pmol each  
342 of primers Ehd-239F–Ehd-88R, BhrDR-RD5, Giardia-80F–Giardia-127R, and CrF–CrR (Table S1). The  
343 amplification conditions consisted of 35 cycles of 1 min each at 94°C, 59°C, and 72°C, with an additional  
344 step of 95°C for 15 s, 60°C for 1 min, 95°C for 30 s, and 60°C for 15 s (55). Samples previously known to  
345 be positive for each parasite as well as standard curves using DNA from each parasite from an ATCC's  
346 enteric protist DNA panel were included as positive controls in the qPCR plates. The difference between  
347 the average cycle threshold (CT) value of each parasite qPCR and the average CT value of the 18S rRNA  
348 gene reaction was calculated to determine the parasitic loads in each sample.

349

### 350 **Determination of fecal bacteria composition**

351 DNA isolated from mothers and children fecal samples was used for the sequencing of microbial  
352 communities. For bacterial determination, samples were amplified by PCR in triplicate using bar-coded  
353 primer pairs flanking the V4 region of the 16S rRNA gene as previously described (56, 57). Each 50 µl of  
354 PCR mixture contained 22 µl of water, 25 µl of TopTaq master mix (Qiagen), 0.5 µl of each forward and  
355 reverse bar-coded primer (57), and 2 µl of template DNA. To ensure no contamination occurred, controls  
356 without template DNA were included. Amplification was performed with an initial DNA denaturation step

357 at 95°C (5 min), 25 cycles of DNA denaturation at 95°C (1 min), an annealing step at 50°C (1 min), an  
358 elongation step at 72°C (1 min), and a final elongation step at 72°C (7 min). Amplicons displaying bands  
359 at ~250 bp on a 2% agarose gel were purified using the QIAquick PCR purification kit (Qiagen). Purified  
360 samples were quantified with PicoGreen (Invitrogen) in a Tecan M200 plate reader (excitation at 480 nm  
361 and emission at 520 nm).

362 For 16S rRNA gene sequencing, each PCR pool was analyzed on the Agilent Bioanalyzer using the  
363 high-sensitivity double-stranded DNA (dsDNA) assay to determine approximate library fragment size and  
364 verify library integrity. Pooled-library concentrations were determined using the TruSeq DNA sample  
365 preparation kit, version 2 (Illumina). Library pools were diluted to 4 nM and denatured into single strands  
366 using fresh 0.2 N NaOH. The final library loading concentration was 8 pM, with an additional PhiX spike-  
367 in of 20%. Sequencing was carried out using a Hi-Seq 2000 bidirectional Illumina sequencing and cluster  
368 kit, version 4 (Macrogen, Inc.).

369

### 370 **Determination of fecal eukaryotic composition**

371 The composition of eukaryotic microorganisms was determined by 18S rRNA gene sequencing.  
372 DNA samples were sent to the Integrated Microbiome Resource at Dalhousie University for amplification  
373 and sequencing. The 18S rRNA gene was amplified with the primers E572F (5'  
374 YGCGGTAATTCCAGCTC 3') and E1009R (5' AYGGTATCTRATCRTCCTTYG 3'), and the reaction  
375 mixture included a PNA blocking primer (5' TCTTAATCATGGCCTCAGTT 3') to reduce amplification  
376 of mammalian sequences. Amplification was carried out in duplicate, with one reaction mixture using  
377 undiluted DNA and the other using DNA diluted 1:10 in PCR water. Amplification was conducted  
378 according to previously described protocols (58). PCR products were visualized on E-gels, quantified  
379 using Invitrogen Qubit with PicoGreen, and pooled at equal concentrations, according to a previous report  
380 (58). PhiX was spiked in at 5%, and the resulting library was sequenced at Dalhousie University on the  
381 Illumina MiSeq using the MiSeq 500-cycle reagent kit, version 2 (250 x 2).

382

### 383 **Bioinformatics analysis**

384 Sequences were preprocessed, demultiplexed, denoised, quality filtered, trimmed and chimeras  
385 removed using the dada2 and vegan packages in R for 16S rRNA gene (59) or QIIME for 18S rRNA gene  
386 (60). Quality sequences were aligned to the SILVA bacterial reference alignment, and OTUs were  
387 generated using a dissimilarity cut-off of 0.03. Sequences were classified using the assignTaxonomy code  
388 and calculated alpha and beta diversities and statistic using phyloseq package in R. We estimated bacterial  
389 alpha-diversity using the Shannon index calculated from OTU relative abundances for each group. For  
390 data visualization ggplot2 package was used.

391 For 18S rRNA sequences, demultiplexed reads were trimmed to a uniform length of 250 bp using  
392 the FastX-Toolkit ([http://hannonlab.cshl.edu/fastx\\_toolkit/](http://hannonlab.cshl.edu/fastx_toolkit/)) and clustered into OTUs using the minimum  
393 entropy decomposition (MED) method (61) as implemented in the oligotyping microbial analysis software  
394 package (62). MED performs de novo taxonomic clustering using Shannon entropy to separate  
395 biologically meaningful patterns of nucleotide diversity from sequencing noise; the processed data are  
396 partitioned into phylogenetically homogeneous units (MED nodes) for downstream bacterial diversity  
397 analyses. This analysis was carried out with the minimum substantive abundance parameter (-M) set at  
398 250 reads. All other parameters were run with default settings; the maximum variation allowed per node -  
399 V) was automatically set at 3 nucleotides.

400 Representative sequences were classified by clustering against the Greengenes Database at 97%  
401 similarity (16S rRNA gene [63]) or SILVA release 123 at 99% similarity (18S rRNA gene [64]). The 16S  
402 rRNA gene data set was filtered to remove mitochondrion and chloroplast sequences and OTUs present in  
403 fewer than three samples. The 18S rRNA gene data set was filtered to remove mammalian and plant  
404 sequences and all OTUs present in fewer than three samples. Both data sets were filtered to exclude  
405 singletons and doubletons.

406

407 **Statistical analysis**

408 Differences in frequencies for categorical and continuous variables between cases and controls  
409 were evaluated using the chi-squared and Student's t test, respectively.

410 Microbial diversity and the relative abundances of bacterial and eukaryotic taxa was evaluated  
411 using phyloseq (65), along with additional R-based computational tools (66-72). PCoAs were conducted  
412 using phyloseq (Bray-Curtis dissimilarities as distance metric) on both variance-stabilizing-transformed  
413 and rarefied OTU matrices and then statistically confirmed by a permutational multivariate analysis of  
414 variance (PERMANOVA) to confirm that our results were not a consequence of heteroscedastic dispersion  
415 between groups (65). The Shannon and Chao1 alpha diversity indexes were calculated using phyloseq and  
416 statistically confirmed by the Mann-Whitney test (GraphPad Prism software, version 5c).

417 The R packages DESeq2 (72) and MaAsLin (73) were used to calculate differentially abundant  
418 OTUs. Correlation analysis was performed using the bicor method in the R package microbiome to  
419 correlate the 100 most abundant OTUs from the 16S and 18S rRNA gene data sets. Features in the analysis  
420 were included as OTUs and as OTUs combined into taxonomic families.

421

422 **ACKNOWLEDGEMENTS**

423 This work was funded by grant numbers IN226511 and IN218214 from PAPIIT program at UNAM: grant  
424 FIS/IMSS/PROT/1368 from IMSS, and grants numbers 140990, 272601, 283522, and 257091 from the  
425 National Council of Sciences and Technology in Mexico (CONACyT) to C.X.-G. and J.T., Canadian  
426 Institutes for Health Research grants to B.B.F. and a Human Frontier Science Program grant to L.W.P.  
427 (grant number RGY0078/2015). The funders had no role in study design, data collection and  
428 interpretation, or the decision to submit the work for publication. O.P.-R. (proposal number 208253) and  
429 M.E.N.-R. (proposal number 235618) each received a 1-year scholarship from the Estancias Posdoctorales  
430 al Extranjero para la Consolidacion de Grupos de Investigación program of CONACyT.

431 We thank all study participants from Xoxocotla as well as the personnel involved in this cohort.

432

433

434 Author contributions:

435 O.P.-R., M.N.-R., M.C.A., E.B., C.X., and B.B.F. designed the study. A.V.-S., P.M., J.T, O.P.-R., M.N.-

436 R., E.G., E. R, U.M, L.R.-V., E.H, and C.X. coordinated and facilitated the cohort study in Xoxocotla.

437 P.M. and C.X. conducted medical examinations and Rome III questionnaires. A.V.-S. curated the database

438 and metadata. M.C.A. and L.W.P. optimized sequencing strategies. O.P.-R. and M.N.-R. prepared samples

439 for sequencing analysis. M.C.A. and E.M. performed the bioinformatics analysis of sequencing data.

440 M.C.A. and I.L.-L. designed and performed statistical analyses and created figures for the paper. O.P.-R.,

441 I.L.-L. and M.C.A. wrote the paper. M.E.N.-R., I.L.-L., L.W.P, L.R., C.X.-G., M.C.A. and B.B.F. edited.

442

443 **REFERENCES**

- 444 1. Leung JM, Graham AL, Knowles SCL. Parasite-microbiota interactions with the vertebrate gut:  
445 synthesis through an ecological lens. *Front Microbiol.* 2018 May 14;9:843.  
446 <https://doi.org/10.3389/fmicb.2018.00843>.
- 447
- 448 2. Berrilli F, Di Cave D, Cavallero S, D'Amelio S. Interactions between parasites and microbial  
449 communities in the human gut. *Front Cell Infect Microbiol.* 2012 Nov 16;2:141.  
450 <https://doi.org/10.3389/fcimb.2012.00141>.
- 451
- 452 3. Parfrey LW, Walters WA, Lauber CL, Clemente JC, Berg-Lyons D, Teiling C, Kodira C, Mohiuddin M,  
453 Brunelle J, Driscoll M, Fierer N, Gilbert JA, Knight R. Communities of microbial eukaryotes in the  
454 mammalian gut within the context of environmental eukaryotic diversity. *Front Microbiol.* 2014 Jun  
455 19;5:298. <https://doi.org/10.3389/fmicb.2014.00298>.
- 456
- 457 4. Lukeš J, Stensvold CR, Jirků-Pomajbíková K, Wegener Parfrey L. Are human intestinal eukaryotes  
458 beneficial or commensals? *PLoS Pathog.* 2015 Aug 13;11(8):e1005039.  
459 <https://doi.org/10.1371/journal.ppat.1005039>.
- 460
- 461 5. Morton ER, Lynch J, Froment A, Lafosse S, Heyer E, Przeworski M, Blekhman R, Ségurel L. Variation  
462 in rural African gut microbiota is strongly correlated with colonization by *Entamoeba* and subsistence.  
463 *PLoS Genet.* 2015 Nov 30;11(11):e1005658. <https://doi.org/10.1371/journal.pgen.1005658>.
- 464
- 465 6. Bär AK, Phukan N, Pinheiro J, Simoes-Barbosa A. The interplay of host microbiota and parasitic  
466 protozoans at mucosal interfaces: Implications for the outcomes of infections and diseases. *PLoS Negl*  
467 *Trop Dis.* 2015 Dec 10;9(12):e0004176. <https://doi.org/10.1371/journal.pntd.0004176>.

468

469 7. Iebba V, Santangelo F, Totino V, Pantanella F, Monsia A, Di Cristanziano V, Di Cave D, Schippa S,  
470 Berrilli F, D'Alfonso R. Gut microbiota related to *Giardia duodenalis*, *Entamoeba spp.* and *Blastocystis*  
471 *hominis* infections in humans from Côte d'Ivoire. J Infect Dev Ctries. 2016 Sep 30;10(9):1035-1041.  
472 <https://doi.org/10.3855/jidc.8179>.

473

474 8. Burgess SL, Gilchrist CA, Lynn TC, Petri WA Jr. Parasitic protozoa and interactions with the host  
475 intestinal microbiota. Infect Immun. 2017 Jul 19;85(8). pii: e00101-17. [https://doi.org/10.1128/IAI.00101-](https://doi.org/10.1128/IAI.00101-17)  
476 [17](https://doi.org/10.1128/IAI.00101-17).

477

478 9. Partida-Rodríguez O, Serrano-Vázquez A, Nieves-Ramírez ME, Moran P, Rojas L, Portillo T, González  
479 E, Hernández E, Finlay BB, Ximenez C. Human intestinal microbiota: Interaction between parasites and  
480 the host immune response. Arch Med Res. 2017 Nov;48(8):690-700.  
481 <https://doi.org/10.1016/j.arcmed.2017.11.015>.

482

483 10. Krogsgaard LR, Andersen LO', Johannesen TB, Engsbro AL, Stensvold CR, Nielsen HV, Bytzer P.  
484 Characteristics of the bacterial microbiome in association with common intestinal parasites in irritable  
485 bowel syndrome. Clin Transl Gastroenterol. 2018 Jun 19;9(6):161. [https://doi.org/10.1038/s41424-018-](https://doi.org/10.1038/s41424-018-0027-2)  
486 [0027-2](https://doi.org/10.1038/s41424-018-0027-2).

487

488 11. Nieves-Ramírez ME, Partida-Rodríguez O, Laforest-Lapointe I, Reynolds LA, Brown EM, Valdez-  
489 Salazar A, Morán-Silva P, Rojas-Velázquez L, Morien E, Parfrey LW, Jin M, Walter J, Torres J, Arrieta  
490 MC, Ximénez-García C, Finlay BB. Asymptomatic intestinal colonization with protist *Blastocystis* is  
491 strongly associated with distinct microbiome ecological patterns. mSystems. 2018 Jun 26;3(3). pii:  
492 e00007-18. <https://doi.org/10.1128/mSystems.00007-18>.

493

494 12. Arboleya S, Binetti A, Salazar N, Fernández N, Solís G, Hernández-Barranco A, Margolles A, de Los  
495 Reyes-Gavilán CG, Gueimonde M. Establishment and development of intestinal microbiota in preterm  
496 neonates. FEMS Microbiol Ecol. 2012 Mar;79(3):763-72. [https://doi.org/10.1111/j.1574-](https://doi.org/10.1111/j.1574-6941.2011.01261.x)  
497 [6941.2011.01261.x](https://doi.org/10.1111/j.1574-6941.2011.01261.x).

498

499 13. Matamoros S, Gras-Leguen C, Le Vacon F, Potel G, de La Cochetiere MF. Development of intestinal  
500 microbiota in infants and its impact on health. Trends Microbiol. 2013 Apr;21(4):167-73.  
501 <https://doi.org/10.1016/j.tim.2012.12.001>.

502

503 14. Tanaka M, Nakayama J. Development of the gut microbiota in infancy and its impact on health in later  
504 life. Allergol Int. 2017 Oct;66(4):515-522. <https://doi.org/10.1016/j.alit.2017.07.010>.

505

506 15. Ihekweazu FD, Versalovic J. Development of the pediatric gut microbiome: Impact on health and  
507 disease. Am J Med Sci. 2018 Nov;356(5):413-423. <https://doi.org/10.1016/j.amjms.2018.08.005>.

508

509 16. Robertson RC, Manges AR, Finlay BB, Prendergast AJ. The human microbiome and child growth -  
510 first 1000 days and beyond. Trends Microbiol. 2019 Feb;27(2):131-147.

511 <https://doi.org/10.1016/j.tim.2018.09.008>.

512

513 17. Anderson MJ. 2001. A new method for non-parametric multivariate analysis of variance. Austral  
514 Ecology 26(1):32-6. <https://doi.org/10.1111/j.1442-9993.2001.01070.pp.x>.

515

516 18. Stewart CJ, Ajami NJ, O'Brien JL, Hutchinson DS, Smith DP, Wong MC, Ross MC, Lloyd RE,

517 Doddapaneni H, Metcalf GA, Muzny D, Gibbs RA, Vatanen T, Huttenhower C, Xavier RJ, Rewers M,



- 518 Hagopian W, Toppari J, Ziegler AG, She JX, Akolkar B, Lernmark A, Hyoty H, Vehik K, Krischer JP,  
519 Petrosino JF. Temporal development of the gut microbiome in early childhood from the TEDDY study.  
520 Nature. 2018 Oct;562(7728):583-588. <https://doi.org/10.1038/s41586-018-0617-x>.  
521
- 522 19. WHO, Prevention and control of intestinal parasitic infections. Report of a WHO Expert Committee.  
523 World Health Organ Tech Rep Ser. 1987;749:1-86.  
524 [https://www.who.int/neglected\\_diseases/resources/who\\_trs\\_749/en/](https://www.who.int/neglected_diseases/resources/who_trs_749/en/).  
525
- 526 20. WHO, Public health significance of intestinal parasitic infections. WHO Expert Committee. Bull  
527 World Health Organ. 1987a;65(5):575-88. <https://www.ncbi.nlm.nih.gov/pmc/articles/PMC2491073/>.  
528
- 529 21. Walk ST, Blum AM, Ewing SA, Weinstock JV, Young VB. Alteration of the murine gut microbiota  
530 during infection with the parasitic helminth *Heligmosomoides polygyrus*. Inflamm Bowel Dis. 2010  
531 Nov;16(11):1841-9. <https://doi.org/10.1002/ibd.21299>.  
532
- 533 22. Verma AK, Verma R, Ahuja V, Paul J. Real-time analysis of gut flora in *Entamoeba histolytica*  
534 infected patients of Northern India. BMC Microbiol. 2012 Aug 22;12:183. [https://doi.org/10.1186/1471-  
535 2180-12-183](https://doi.org/10.1186/1471-2180-12-183).  
536
- 537 23. Cooper P, Walker AW, Reyes J, Chico M, Salter SJ, Vaca M, Parkhill J. Patent human infections with  
538 the whipworm, *Trichuris trichiura*, are not associated with alterations in the faecal microbiota. PLoS One.  
539 2013 Oct 4;8(10):e76573. <https://doi.org/10.1371/journal.pone.0076573>. eCollection 2013.  
540
- 541 24. Holm JB, Sorobetea D, Kiilerich P, Ramayo-Caldas Y, Estellé J, Ma T, Madsen L, Kristiansen K,  
542 Svensson-Frej M. Chronic *Trichuris muris* infection decreases diversity of the intestinal microbiota and

- 543 concomitantly increases the abundance of lactobacilli. PLoS One. 2015 May 5;10(5):e0125495.  
544 <https://doi.org/10.1371/journal.pone.0125495>.
- 545
- 546 25. Steinmann P, Utzinger J, Du ZW, Zhou XN. Multiparasitism a neglected reality on global, regional  
547 and local scale. Adv Parasitol. 2010;73:21-50. [https://doi.org/10.1016/S0065-308X\(10\)73002-5](https://doi.org/10.1016/S0065-308X(10)73002-5).
- 548
- 549 26. Viney ME, Graham AL. Patterns and processes in parasite co-infection. Adv Parasitol. 2013;82:321-  
550 69. <https://doi.org/10.1016/B978-0-12-407706-5.00005-8>.
- 551
- 552 27. Hellard E, Fouchet D, Vavre F, Pontier D. Parasite-parasite interactions in the wild: how to detect  
553 them? Trends Parasitol. 2015 Dec;31(12):640-652. <https://doi.org/10.1016/j.pt.2015.07.005>.
- 554
- 555 28. Seppälä O, Jokela J. Do coinfections maintain genetic variation in parasites? Trends Parasitol. 2016  
556 Dec;32(12):930-938. <https://doi.org/10.1016/j.pt.2016.08.010>.
- 557
- 558 29. Morrill A, Dargent F, Forbes MR. Explaining parasite aggregation: more than one parasite species at a  
559 time. Int J Parasitol. 2017 Mar;47(4):185-188. <https://doi.org/10.1016/j.ijpara.2016.11.005>.
- 560
- 561 30. Toro-Londono MA, Bedoya-Urrego K, Garcia-Montoya GM, Galvan-Diaz AL, Alzate JF. Intestinal  
562 parasitic infection alters bacterial gut microbiota in children. PeerJ. 2019 Jan 7;7:e6200.  
563 <https://doi.org/10.7717/peerj.6200>.
- 564
- 565 31. Ferretti P, Pasolli E, Tett A, Asnicar F, Gorfer V, Fedi S, Armanini F, Truong DT, Manara S, Zolfo M,  
566 Beghini F, Bertorelli R, De Sanctis V, Bariletti I, Canto R, Clementi R, Cologna M, Crifò T, Cusumano G,  
567 Gottardi S, Innamorati C, Masè C, Postai D, Savoi D, Duranti S, Lugli GA, Mancabelli L, Turrone F,

- 568 Ferrario C, Milani C, Mangifesta M, Anzalone R, Viappiani A, Yassour M, Vlamakis H, Xavier R,  
569 Collado CM, Koren O, Tateo S, Soffiati M, Pedrotti A, Ventura M, Huttenhower C, Bork P, Segata N.  
570 Mother-to-infant microbial transmission from different body sites shapes the developing infant gut  
571 microbiome. *Cell Host Microbe*. 2018 Jul 11;24(1):133-145.e5.  
572 <https://doi.org/10.1016/j.chom.2018.06.005>.
- 573
- 574 32. Vaishampayan PA, Kuehl JV, Froula JL, Morgan JL, Ochman H, Francino MP. Comparative  
575 metagenomics and population dynamics of the gut microbiota in mother and infant. *Genome Biol Evol*.  
576 2010 Jan 6;2:53-66. <https://doi.org/10.1093/gbe/evp057>.
- 577
- 578 33. Grönlund MM, Grześkowiak Ł, Isolauri E, Salminen S. Influence of mother's intestinal microbiota on  
579 gut colonization in the infant. *Gut Microbes*. 2011 Jul-Aug;2(4):227-33.  
580 <https://doi.org/10.4161/gmic.2.4.16799>.
- 581
- 582 34. Dunn LA, Boreham PF, Stenzel DJ. Ultrastructural variation of *Blastocystis hominis* stocks in culture.  
583 *Int J Parasitol*. 1989 Feb;19(1):43-56. [https://doi.org/10.1016/0020-7519\(89\)90020-9](https://doi.org/10.1016/0020-7519(89)90020-9).
- 584
- 585 35. Brewer MT, Agbedanu PN, Zamanian M, Day TA, Carlson SA. Evidence for a bacterial  
586 lipopolysaccharide-recognizing G-protein-coupled receptor in the bacterial engulfment by *Entamoeba*  
587 *histolytica*. *Eukaryot Cell*. 2013 Nov;12(11):1433-8. <https://doi.org/10.1128/EC.00150-13>.
- 588
- 589 36. Sun S, Noorian P, McDougald D. Dual role of mechanisms involved in resistance to predation by  
590 protozoa and virulence to humans. *Front Microbiol*. 2018 May 17;9:1017.  
591 <https://doi.org/10.3389/fmicb.2018.01017>.
- 592

- 593 37. White EC, Houlden A, Bancroft AJ, Hayes KS, Goldrick M, Grecis RK, Roberts IS. Manipulation of  
594 host and parasite microbiotas: Survival strategies during chronic nematode infection. *Sci Adv.* 2018 Mar  
595 14;4(3):eaap7399. <https://doi.org/10.1126/sciadv.aap7399>.
- 596
- 597 38. Seiler C, van Velzen E, Neu TR, Gaedke U, Berendonk TU, Weitere M. Grazing resistance of bacterial  
598 biofilms: a matter of predators' feeding trait. *FEMS Microbiol Ecol.* 2017 Sep 1;93(9).  
599 <https://doi.org/10.1093/femsec/fix112>.
- 600
- 601 39. Hicks SJ, Theodoropoulos G, Carrington SD, Corfield AP. The role of mucins in host-parasite  
602 interactions. Part I-protozoan parasites. *Parasitol Today.* 2000 Nov;16(11):476-81. Review.  
603 [https://doi.org/10.1016/S0169-4758\(00\)01773-7](https://doi.org/10.1016/S0169-4758(00)01773-7). Erratum in: *Trends Parasitol* 2001 Mar;17(3):135.  
604
- 605 40. Beatty JK, Akierman SV, Motta JP, Muise S, Workentine ML, Harrison JJ, Bhargava A, Beck PL,  
606 Rioux KP, McKnight GW, Wallace JL, Buret AG. *Giardia duodenalis* induces pathogenic dysbiosis of  
607 human intestinal microbiota biofilms. *Int J Parasitol.* 2017 May;47(6):311-326.  
608 <https://doi.org/10.1016/j.ijpara.2016.11.010>.
- 609
- 610 41. Theodoropoulos G, Hicks SJ, Corfield AP, Miller BG, Carrington SD. The role of mucins in host-  
611 parasite interactions: Part II - helminth parasites. *Trends Parasitol.* 2001 Mar;17(3):130-5. Review.  
612 [https://doi.org/10.1016/S1471-4922\(00\)01775-X](https://doi.org/10.1016/S1471-4922(00)01775-X).
- 613
- 614 42. Sharpe C, Thornton DJ, Grecis RK. A sticky end for gastrointestinal helminths; the role of the mucus  
615 barrier. *Parasite Immunol.* 2018 Apr;40(4):e12517. <https://doi.org/10.1111/pim.12517>.
- 616

- 617 43. Broadhurst MJ, Ardeshir A, Kanwar B, Mirpuri J, Gundra UM, Leung JM, Wiens KE, Vujkovic-  
618 Cvijin I, Kim CC, Yarovinsky F, Lerche NW, McCune JM, Loke P. Therapeutic helminth infection of  
619 macaques with idiopathic chronic diarrhea alters the inflammatory signature and mucosal microbiota of  
620 the colon. PLoS Pathog. 2012;8(11):e1003000. <https://doi.org/10.1371/journal.ppat.1003000>.  
621
- 622 44. Finney CA, Taylor MD, Wilson MS, Maizels RM. Expansion and activation of CD4(+) CD25(+)  
623 regulatory T cells in *Heligmosomoides polygyrus* infection. Eur J Immunol. 2007 Jul;37(7):1874-86.  
624 <https://doi.org/10.1002/eji.200636751>.  
625
- 626 45. D'Elia R, Behnke JM, Bradley JE, Else KJ. Regulatory T cells: a role in the control of helminth-driven  
627 intestinal pathology and worm survival. J Immunol. 2009 Feb 15;182(4):2340-8.  
628 <https://doi.org/10.4049/jimmunol.0802767>.  
629
- 630 46. Reynolds LA, Finlay BB, Maizels RM. cohabitation in the intestine: interactions among helminth  
631 parasites, bacterial microbiota, and host immunity. J Immunol. 2015 Nov 1;195(9):4059-66.  
632 <https://doi.org/10.4049/jimmunol.1501432>.  
633
- 634 47. Hoffmann C, Dollive S, Grunberg S, Chen J, Li H, Wu GD, Lewis JD, Bushman FD. Archaea and  
635 fungi of the human gut microbiome: Correlations with diet and bacterial residents. PLoS One. 2013 Jun  
636 17;8(6):e66019. <https://doi.org/doi:10.1371/journal.pone.0066019>.  
637
- 638 48. Sam QH, Chang MW, Chai LY. the fungal mycobiome and its interaction with gut bacteria in the host.  
639 Int J Mol Sci. 2017 Feb 4;18(2). pii: E330. <https://doi.org/10.3390/ijms18020330>.  
640

- 641 49. Mukherjee PK, Sendid B, Hoarau G, Colombel JF, Poulain D, Ghannoum MA. Mycobiota in  
642 gastrointestinal diseases. *Nat Rev Gastroenterol Hepatol*. 2015 Feb;12(2):77-87.  
643 <https://doi.org/10.1038/nrgastro.2014.188>.  
644
- 645 50. Huseyin CE, O'Toole PW, Cotter PD, Scanlan PD. Forgotten fungi-the gut mycobiome in human  
646 health and disease. *FEMS Microbiol Rev*. 2017 Jul 1;41(4):479-511.  
647 <https://doi.org/10.1093/femsre/fuw047>.  
648
- 649 51. Kapitan M, Niemiec MJ, Steimle A, Frick JS, Jacobsen ID. Fungi as part of the microbiota and  
650 interactions with intestinal bacteria. *Curr Top Microbiol Immunol*. 2018 Jul 31.  
651 [https://doi.org/10.1007/82\\_2018\\_117](https://doi.org/10.1007/82_2018_117).  
652
- 653 52. Richard ML, Sokol H. The gut mycobiota: Insights into analysis, environmental interactions and role  
654 in gastrointestinal diseases. *Nat Rev Gastroenterol Hepatol*. 2019 Mar 1. [https://doi.org/10.1038/s41575-](https://doi.org/10.1038/s41575-019-0121-2)  
655 [019-0121-2](https://doi.org/10.1038/s41575-019-0121-2).  
656
- 657 53. Mason KL, Erb Downward JR, Mason KD, Falkowski NR, Eaton KA, Kao JY, Young VB, Huffnagle  
658 GB. *Candida albicans* and bacterial microbiota interactions in the cecum during recolonization following  
659 broad-spectrum antibiotic therapy. *Infect Immun*. 2012 Oct;80(10):3371-80.  
660 <https://doi.org/10.1128/IAI.00449-12>.  
661
- 662 54. Drossman DA. 2006. The functional gastrointestinal disorders and the Rome III process.  
663 *Gastroenterology* 130:1377–1390. <https://doi.org/10.1053/j.gastro.2006.03.008>.  
664

- 665 55. Nazeer JT, El Sayed Khalifa K, von Thien H, El-Sibaei MM, Abdel-Hamid MY, Tawfik RA, Tannich  
666 E. 2013. Use of multiplex real-time PCR for detection of common diarrhea causing protozoan parasites in  
667 Egypt. *Parasitol Res* 112:595– 601. <https://doi.org/10.1007/s00436-012-3171-8>.  
668
- 669 56. Bartram AK, Lynch MD, Stearns JC, Moreno-Hagelsieb G, Neufeld JD. 2011. Generation of  
670 multimillion-sequence 16S rRNA gene libraries from complex microbial communities by assembling  
671 paired-end Illumina reads. *Appl Environ Microbiol* 77:3846 –3852. [https://doi.org/10.1128/AEM.02772-  
672 10](https://doi.org/10.1128/AEM.02772-10).  
673
- 674 57. Kozich JJ, Westcott SL, Baxter NT, Highlander SK, Schloss PD. Development of a dual-index  
675 sequencing strategy and curation pipeline for analyzing amplicon sequence data on the MiSeq Illumina  
676 sequencing platform. *Appl Environ Microbiol*. 2013 Sep;79(17):5112-20.  
677 <https://doi.org/10.1128/AEM.01043-13>.  
678
- 679 58. Comeau AM, Douglas GM, Langille MG. 2017. Microbiome helper: a custom and streamlined  
680 workflow for microbiome research. *mSystems* 2:e00127-16. <https://doi.org/10.1128/mSystems.00127-16>.  
681
- 682 59. Schloss PD, Westcott SL, Ryabin T, Hall JR, Hartmann M, Hollister EB, Lesniewski RA, Oakley BB,  
683 Parks DH, Robinson CJ, Sahl JW, Stres B, Thallinger GG, Van Horn DJ, Weber CF. 2009. Introducing  
684 Mothur: Opensource, platform-independent, community-supported software for describing and comparing  
685 microbial communities. *Appl Environ Microbiol* 75:7537–7541. <https://doi.org/10.1128/AEM.01541-09>.  
686
- 687 60. Kuczynski J, Stombaugh J, Walters WA, González A, Caporaso JG, Knight R. 2011. Using QIIME to  
688 analyze 16S rRNA gene sequences from microbial communities. *Curr Protoc Bioinformatics* Chapter  
689 10:Unit 10.7. <https://doi.org/10.1002/0471250953.bi1007s36>.

690

691 61. Eren AM, Maignien L, Sul WJ, Murphy LG, Grim SL, Morrison HG, Sogin ML. 2013. Oligotyping:  
692 differentiating between closely related microbial taxa using 16S rRNA gene data. *Methods Ecol Evol*  
693 4:1111–1119. <https://doi.org/10.1111/2041-210X.12114>.

694

695 62. Eren AM, Morrison HG, Lescault PJ, Reveillaud J, Vineis JH, Sogin ML. 2015. Minimum entropy  
696 decomposition: unsupervised oligotyping for sensitive partitioning of high-throughput marker gene  
697 sequences. *ISME J* 9:968–979. <https://doi.org/10.1038/ismej.2014.195>.

698

699 63. DeSantis TZ, Hugenholtz P, Larsen N, Rojas M, Brodie EL, Keller K, Huber T, Dalevi D, Hu P,  
700 Andersen GL. 2006. Greengenes, a chimera-checked 16S rRNA gene database and workbench compatible  
701 with ARB. *Appl Environ Microbiol* 72:5069–5072. <https://doi.org/10.1128/AEM.03006-05>.

702

703 64. Yilmaz P, Parfrey LW, Yarza P, Gerken J, Pruesse E, Quast C, Schweer T, Peplies J, Ludwig W,  
704 Glöckner FO. 2014. The SILVA and “All-species Living Tree Project (LTP)” taxonomic frameworks.  
705 *Nucleic Acids Res* 42:D643–D648. <https://doi.org/10.1093/nar/gkt1209>.

706

707 65. McMurdie PJ, Holmes S. 2013. Phyloseq: An R package for reproducible interactive analysis and  
708 graphics of microbiome census data. *PLoS One* 8:e61217. <https://doi.org/10.1371/journal.pone.0061217>.

709

710 66. Neuwirth E. 2011. RColorBrewer: ColorBrewer palettes. [https://cran.r-](https://cran.r-project.org/web/packages/RColorBrewer/)  
711 [project.org/web/packages/RColorBrewer/](https://cran.r-project.org/web/packages/RColorBrewer/).

712



- 713 67. Oksanen J, Blanchet FG, Kindt R, Legendre P, Minchin PR, O’Hara RB, Simpson GL, Solymos P,  
714 Henry M, Stevens H, Wagner H. 2013. Vegan: Community ecology package. [https://cran.r-](https://cran.r-project.org/package=vegan)  
715 [project.org/package=vegan](https://cran.r-project.org/package=vegan).  
716  
717 68. Ploner A. 2012. Heatplus: Heatmaps with row and/or column covariates and colored clusters.  
718 <https://bioconductor.org/packages/release/bioc/html/Heatplus.html>.  
719  
720 69. Pollard K, Gilbert HN, Ge Y, Taylor S, Dudoit S. 2005. Multiple testing procedures: R multtst package  
721 and applications to genomics, p 249–271. In Gentleman R, Carey V, Huber W, Irizarry R, Dudoit S (ed),  
722 Bioinformatics and computational biology solutions using R and Bioconductor. Springer-Verlag, New  
723 York, NY. [https://www.bioconductor.org/help/publications/books/bioinformatics-and-computational-](https://www.bioconductor.org/help/publications/books/bioinformatics-and-computational-biology-solutions/)  
724 [biology-solutions/](https://www.bioconductor.org/help/publications/books/bioinformatics-and-computational-biology-solutions/).  
725  
726 70. Wickham H. 2009. ggplot2: Elegant graphics for data analysis. Springer-Verlag, New York, NY.  
727 <https://www.springer.com/gp/book/9780387981413>.  
728  
729 71. Wickham H. 2011. The split-apply-combine strategy for data analysis. J Stat Soft 40:1–29.  
730 <https://doi.org/10.18637/jss.v040.i01>.  
731  
732 72. Love MI, Huber W, Anders S. 2014. Moderated estimation of fold change and dispersion for RNA-seq  
733 data with DESeq2. Genome Biol 15:550. <https://doi.org/10.1186/s13059-014-0550-8>.  
734  
735 73. Morgan XC, Tickle TL, Sokol H, Gevers D, Devaney KL, Ward DV, Reyes JA, Shah SA, LeLeiko N,  
736 Snapper SB, Bousvaros A, Korzenik J, Sands BE, Xavier RJ, Huttenhower C. 2012. Dysfunction of the

737 intestinal microbiome in inflammatory bowel disease and treatment. *Genome Biol* 13:R79.

738 <https://doi.org/10.1186/gb-2012-13-9-r79>.

739

740 **RESULTS FIGURES AND TABLE**

741

742 **TABLE 1.** Demographic data of the children in this study

|                                         | Parasite-positive<br>n=23 | Parasite-negative<br>n=23 | p value* |
|-----------------------------------------|---------------------------|---------------------------|----------|
| Age mean (months)                       | 11.09                     | 11.00                     | 0.9713   |
| Age mean of weaning<br>(months)         | 10.00                     | 12.43                     | 0.0406   |
| Sex (female/male)                       | 12/11                     | 8/15                      | 0.2342   |
| Mode of delivery<br>(vaginal/C-section) | 17/6                      | 17/6                      | >0.9999  |
| Mothers age mean<br>(years)             | 25.35                     | 29.50                     | 0.0196   |

743 \*Statistical analysis was made using Chi-square test for categorical data and t-test for numerical data.

744

745

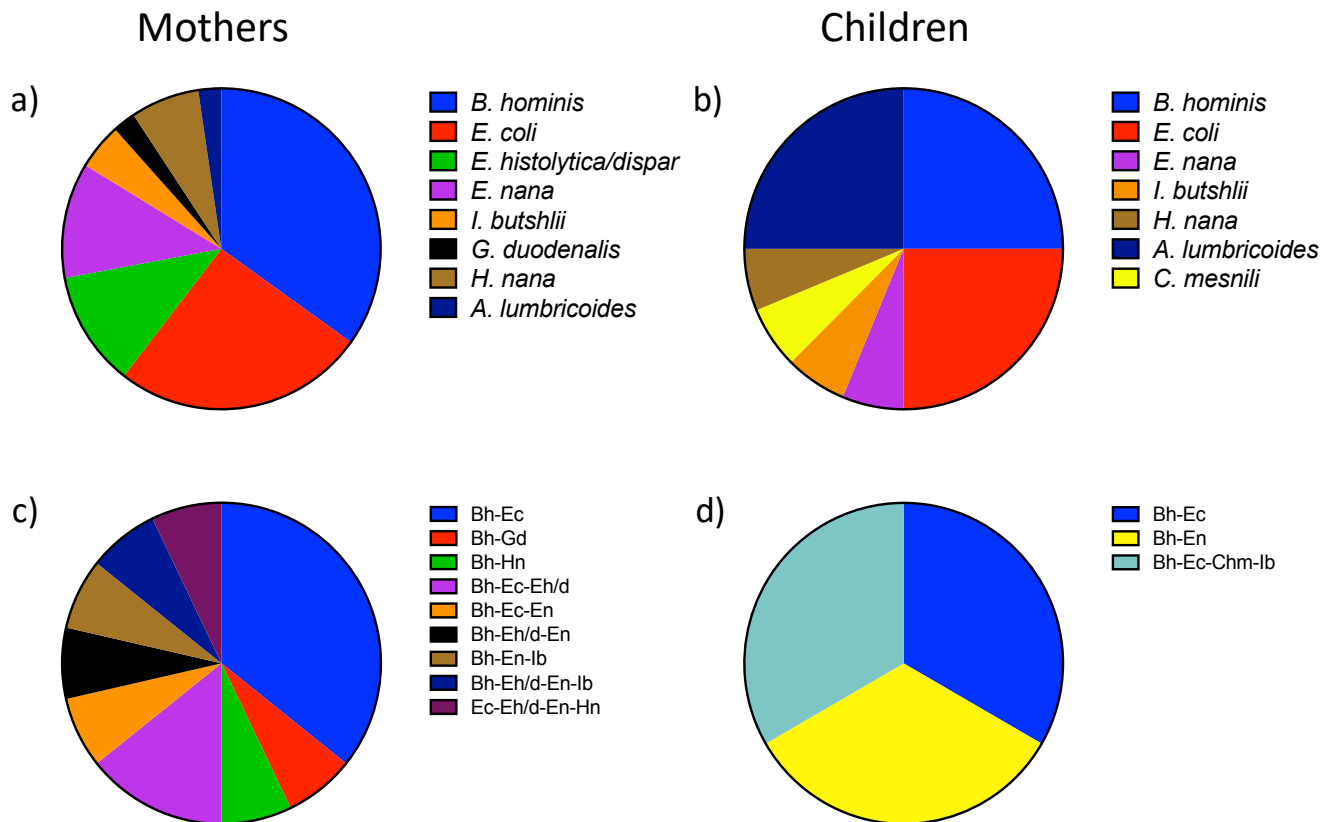

746

747 **FIG. 1** Proportions of parasites found in feces samples from mothers (a, c) and children (b, d) binomes. a)

748 The intestinal parasites found in the mothers comprised *Blastocystis hominis* (Bh) [15 (32.6%)],

749 *Entamoeba coli* (Ec) [11 (23.9%)], *Entamoeba histolytica/dispar* (Eh/d) [5 (10.8%)], *Endolimax nana* (En)

750 [5 (10.8%)], *Iodamoeba butshlii* (Ib) [2 (4.3%)], *Giardia duodenalis* (Gd) [1 (2.2%)], *Chilomastix mesnili*

751 (Chm) [0 (0.0%)], *Hymenolepis nana* (Hn) [3 (6.5%)], and *Ascaris lumbricoides* (Al) [1 (2.2%)]. b) In

752 children, the parasite frequencies found were Bh [4 (8.7%)], Ec [4 (8.7%)], Eh/d [0 (0.0%)], En [1

753 (2.2%)], Ib [1 (2.2%)], Gd [0 (0.0%)], Chm [1 (2.2%)], Hn [1 (2.2%)] and Al [4 (8.7%)]. c) Co-

754 colonisations by two or more parasites found in the mothers included Bh-Ec [5 (10.8%)], Bh-Gd [1

755 (2.2%)], Bh-Hn [1 (2.2%)], Bh-Ec-Eh/d [2 (4.3%)], Bh-Ec-En [1 (2.2%)], Bh-Eh/d-En [1 (2.2%)], Bh-En-

756 Ib [1 (2.2%)], Bh-Eh/d-En-Ib [1 (2.2%)] and Ec-Eh/d-En-Hn [1 (2.2%)]. d) Co-colonisations found in

757 children were Bh-Ec [1 (2.2%)], Bh-En [1 (2.2%)], and Bh-Ec-Chm-Ib [1 (2.2%)].

758 .

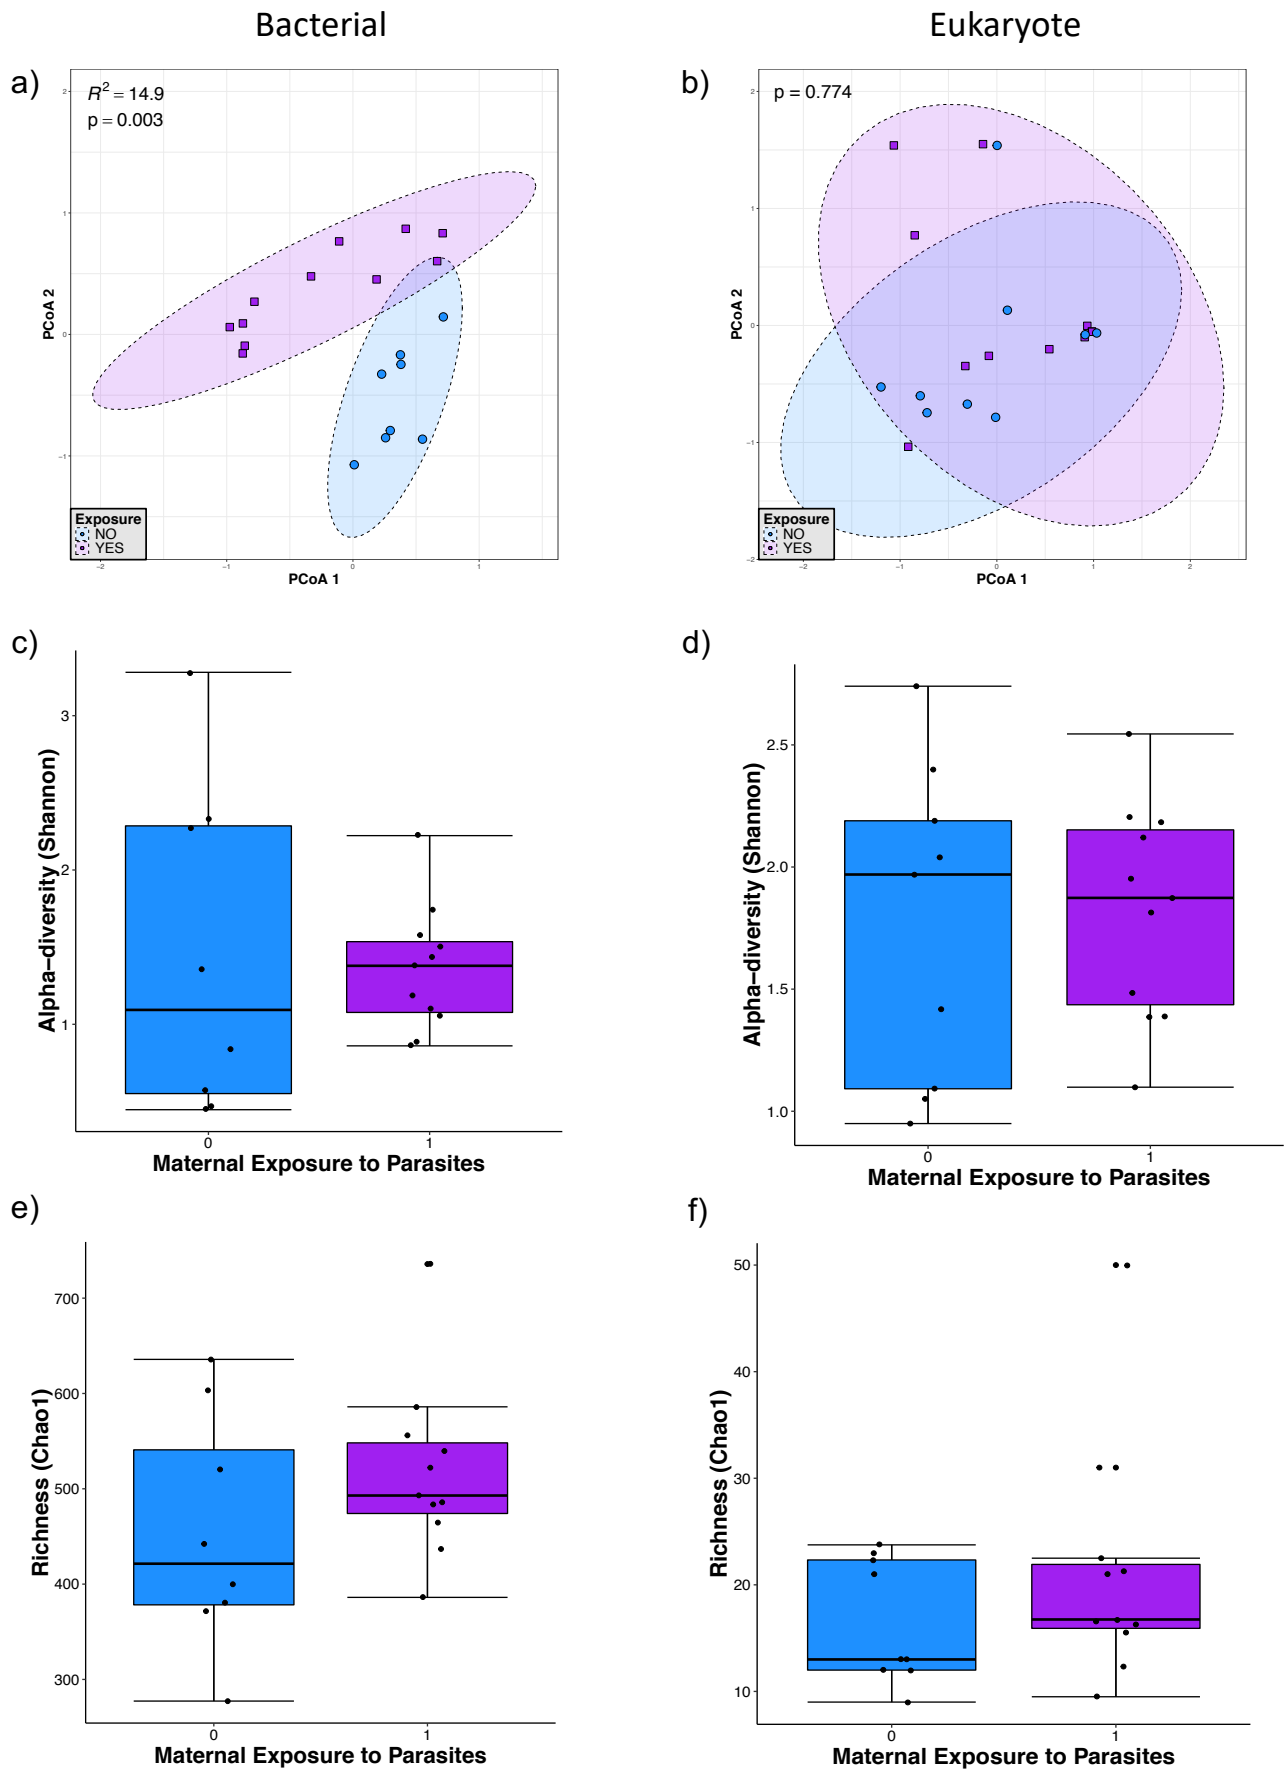

760

761 **FIG. 2** Microbial diversity in infants younger than 5 months of age. a) and b) Principal component  
762 analysis (PCoA) ordination of variation in beta-diversity of human gut bacterial (a) and eukaryote (b)  
763 communities based on Bray-Curtis dissimilarities. Color and shape represent maternal exposure to  
764 parasites (blue circles represent negative exposure and purple squares represent positive exposure).  
765 PERMANOVAs indicate that maternal exposure to parasites explain 15% ( $p=0.003$ ) of the variation in  
766 infant bacterial community structure but is not a significant ( $p=0.774$ ) driver of eukaryote community  
767 structure. c) and d) Shannon diversity of gut bacterial (c) and eukaryote (d) community structure.  
768 (e and f) Chao 1 estimated richness of gut bacterial (e) and eukaryote (f) community structure. No  
769 significant differences were detected by Mann-Whitney tests for alpha-diversity comparison between the  
770 parasite-positive and negative groups.

771

772

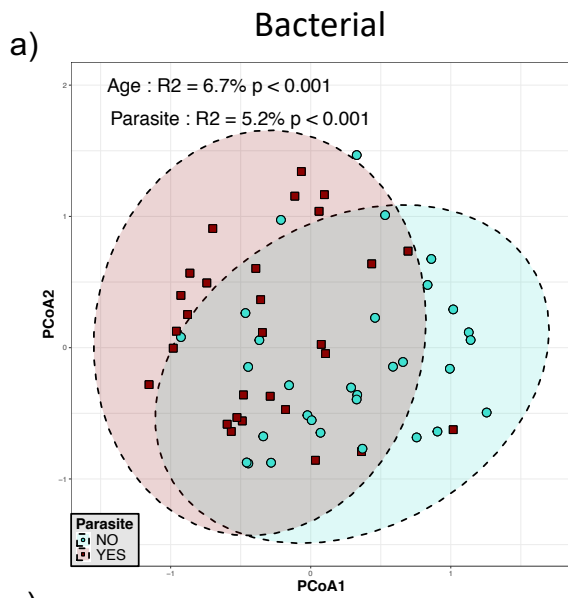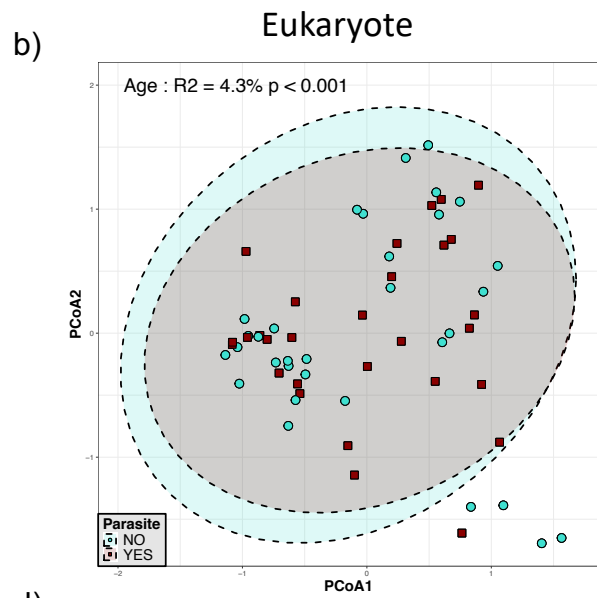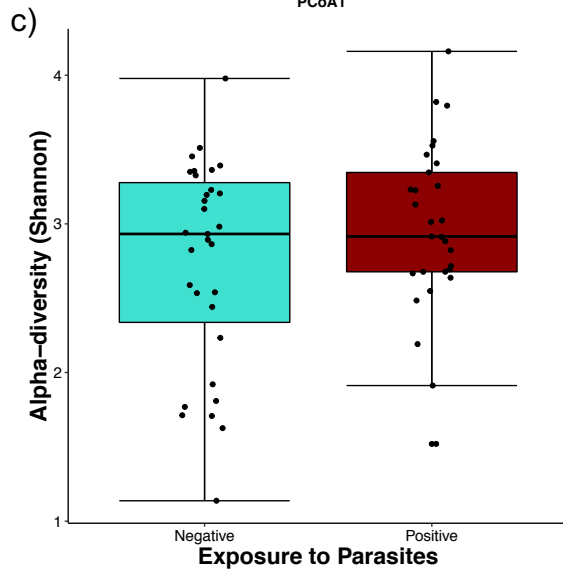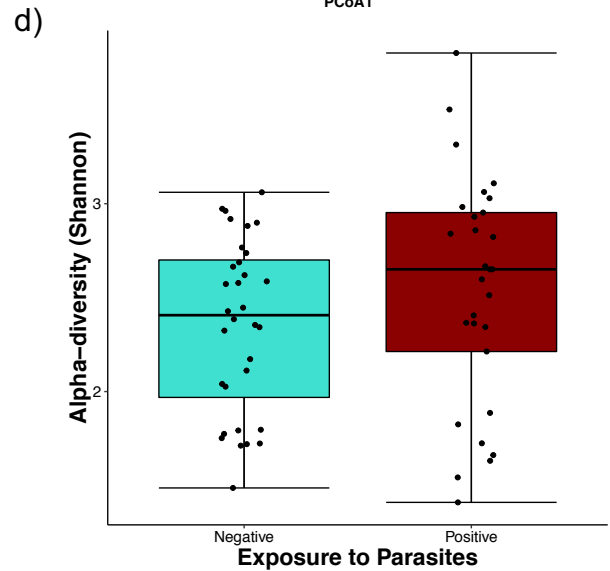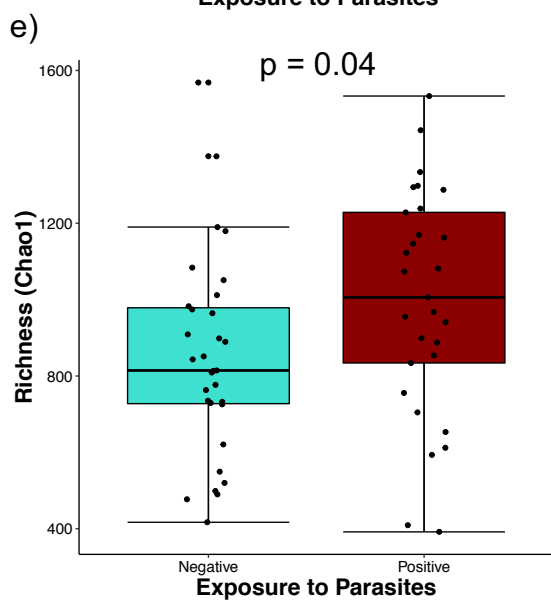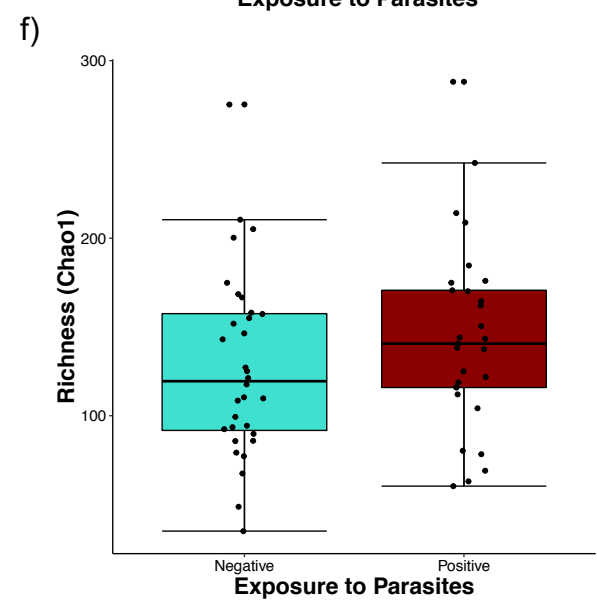

773

774

775 **FIG. 3** Microbial diversity in individuals older than 1yo. a) and b) Principal component analysis (PCoA)  
776 ordination of variation in beta-diversity of human gut bacterial (a) and eukaryote (b) communities based  
777 on Bray-Curtis dissimilarities. Color and shape represent maternal exposure to parasites (turquoise circles  
778 for negative and dark red squares for positive exposure). PERMANOVAs indicate that maternal exposure  
779 to parasites and age explain respectively 5.2% and 6.7% ( $p < 0.001$ ) of the variation bacterial community  
780 structure while age explains 4.3% ( $p < 0.001$ ) of the variation in eukaryote community structure. Ellipses  
781 represent confidence interval at 95%. c) and d) Shannon diversity of gut bacterial (c) and eukaryote (d)  
782 community structure, no significant differences were detected by Mann-Whitney tests for Shannon  
783 diversity between the parasite-positive and negative groups. e) and f) Chao 1 estimated richness of gut  
784 bacterial (e) and eukaryote (f) community structure; a significant difference was detected for bacterial  
785 community richness by Mann-Whitney tests for comparison between two groups.  
786



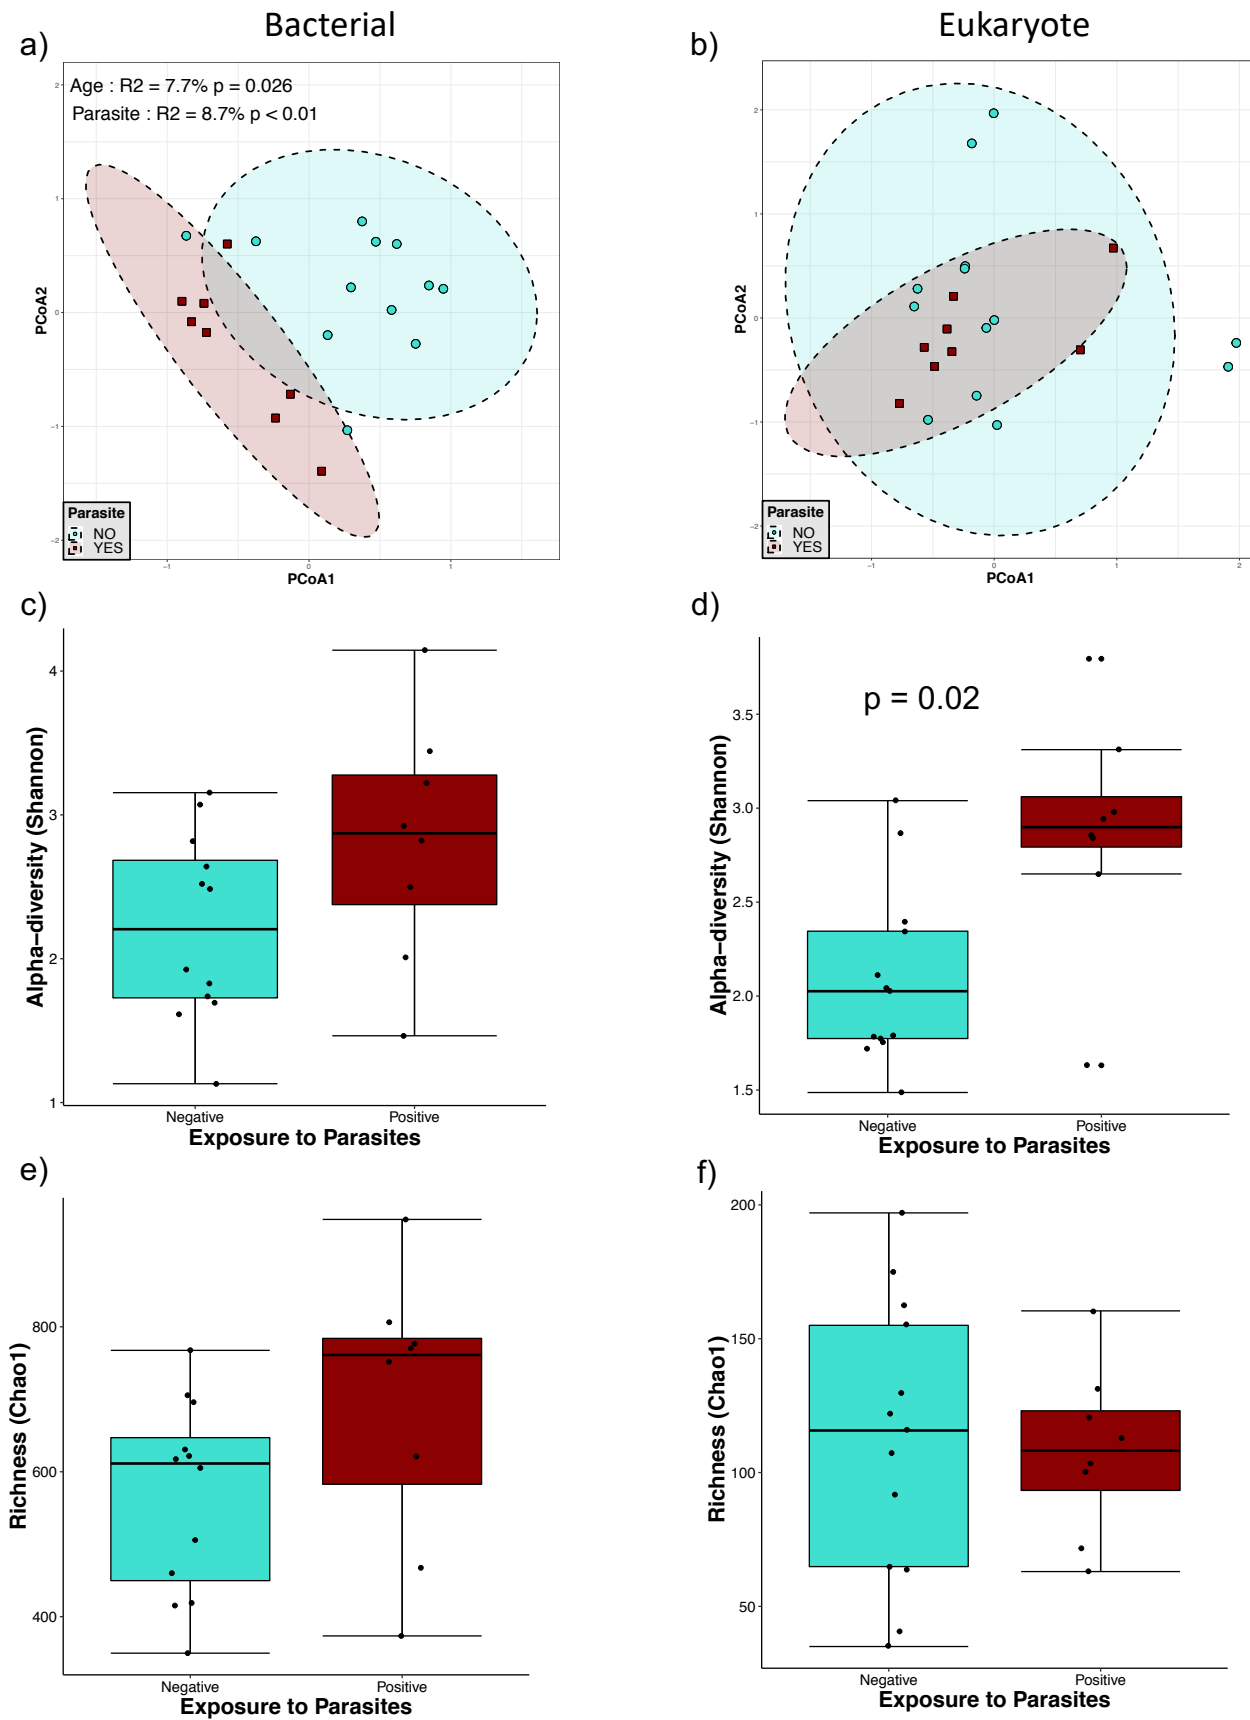

787

788

789 **FIG. 4** Microbial diversity in infants between 1yo and 2yo. a) and b) Principal component analysis  
790 (PCoA) ordination of variation in beta-diversity of human gut bacterial (a) and eukaryote (b) communities  
791 based on Bray-Curtis dissimilarities. Color and shape represent maternal exposure to parasites (turquoise  
792 circles for negative and dark red squares for positive exposure). PERMANOVAs indicate that exposure to  
793 parasites and age explain respectively 8.7% ( $p < 0.01$ ) and 7.7% ( $p = 0.026$ ) of the variation infant gut  
794 bacterial community structure. Ellipses represent confidence interval at 95%. No significant effects of age  
795 or exposure to parasite were detected for eukaryote community structure. c) and d) Shannon diversity of  
796 gut bacterial (c) and eukaryote (d) community structure, a significant difference was only detected for  
797 eukaryote community alpha-diversity by Mann-Whitney tests for comparison between the two groups. e)  
798 and f) Chao 1 estimated richness of gut bacterial (e) and eukaryote (f) community structure; no significant  
799 differences were detected by Mann-Whitney tests for Chao 1 estimated richness between the parasite-  
800 positive and negative groups.

801

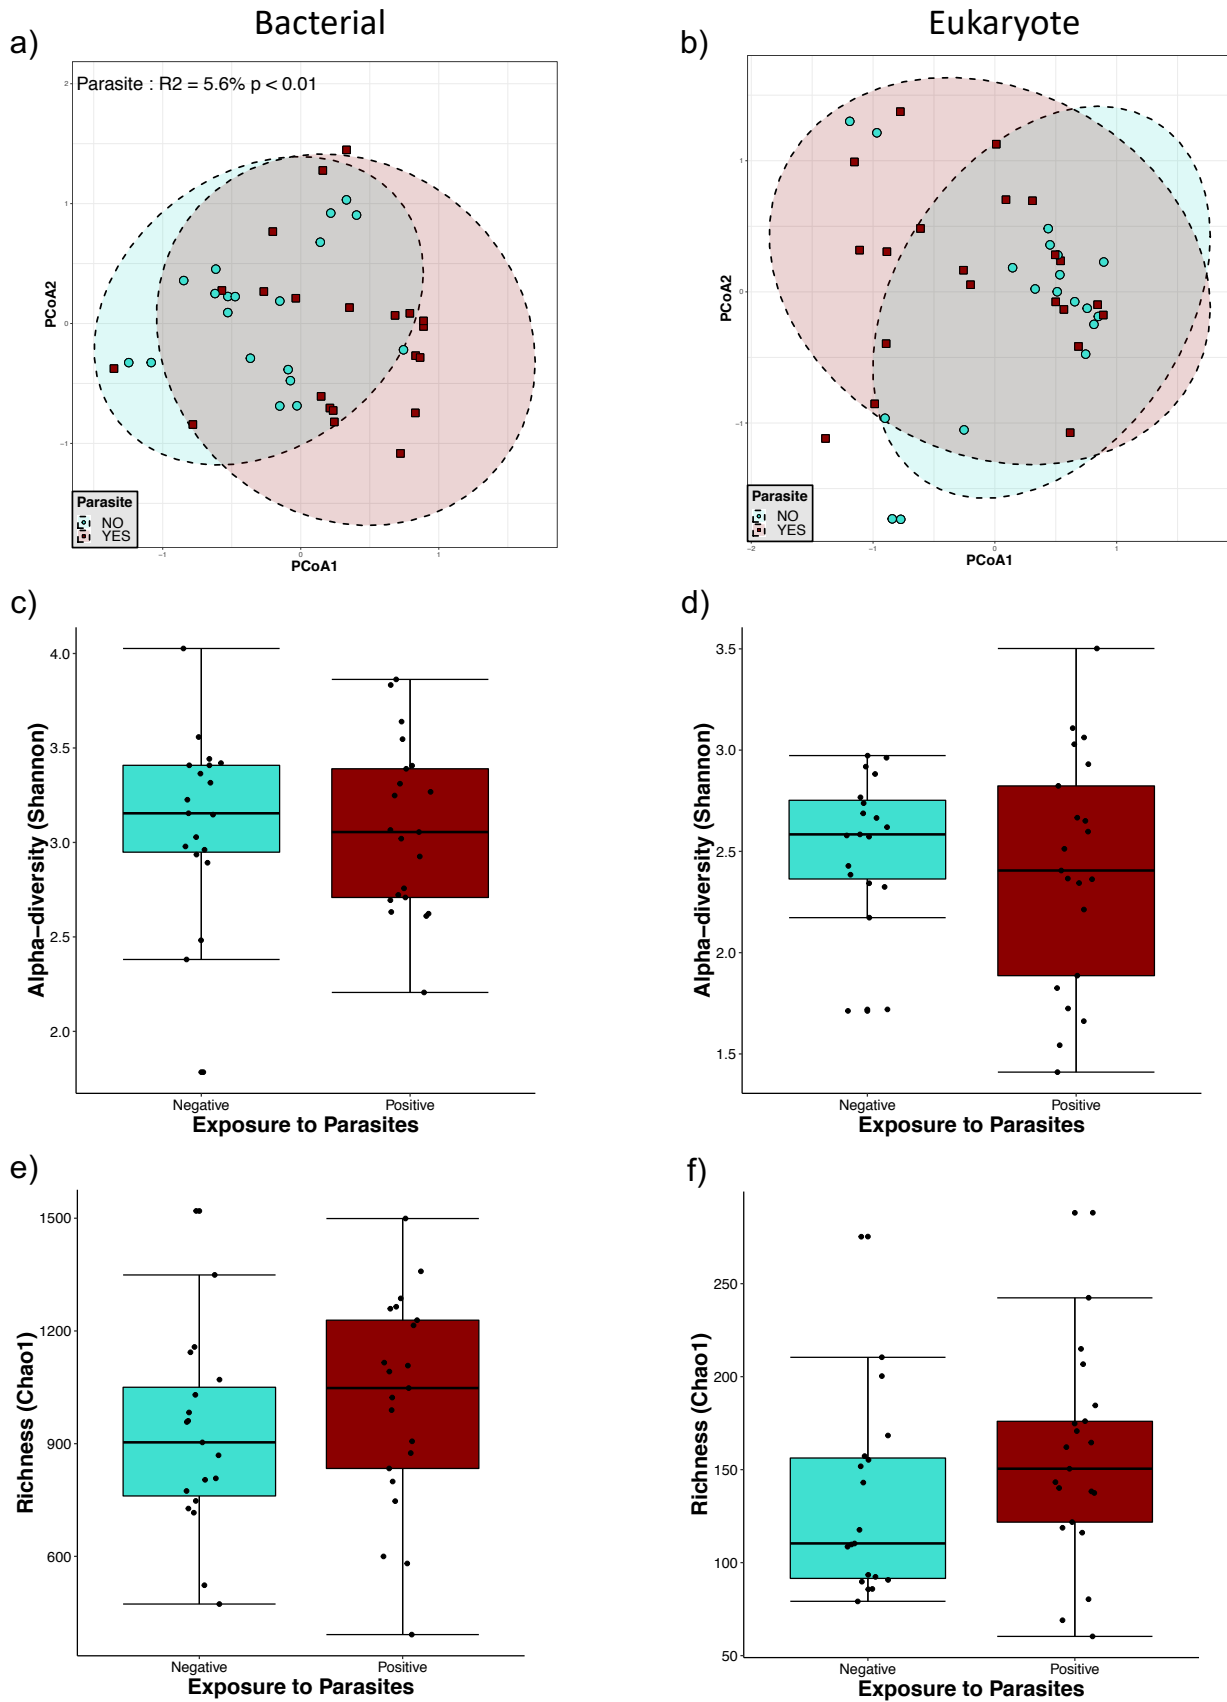

802

803

804 **FIG. 5** Microbial diversity in mothers. a) and b) Principal component analysis (PCoA) ordination of  
805 variation in beta-diversity of human gut bacterial (a) and eukaryote (b) communities based on Bray-Curtis  
806 dissimilarities. Color and shape represent maternal exposure to parasites (turquoise circles for negative and  
807 dark red squares for positive exposure). PERMANOVAs indicate that exposure to parasites explains 5.6%  
808 ( $p < 0.01$ ) of the variation in mother gut bacterial community structure. Ellipses represent confidence  
809 interval at 95%. No significant effects of age or exposure to parasite were detected for eukaryote  
810 community structure. c) and d) Shannon diversity of gut bacterial (c) and eukaryote (d) community  
811 structure. e) and f) Chao 1 estimated richness of gut bacterial (e) and eukaryote (f) community structure.  
812 No significant differences were detected by Mann-Whitney tests for richness and alpha-diversity between  
813 the parasite-positive and negative groups.  
814

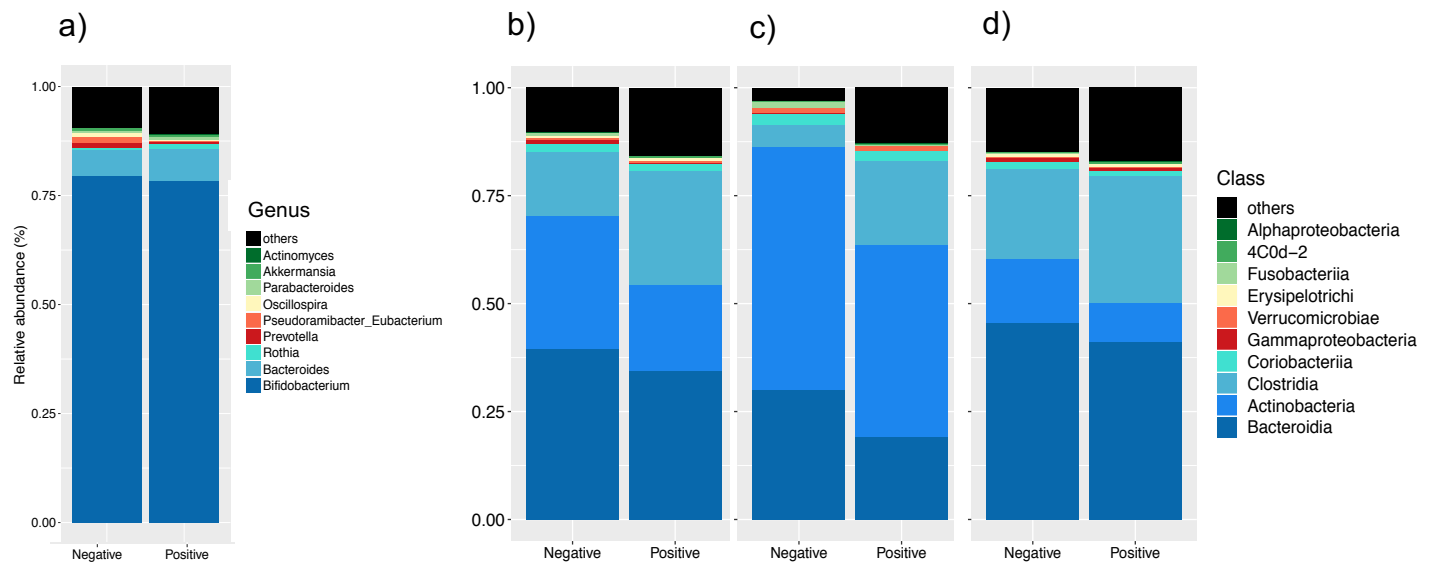

815

816 **FIG. 6** Relative abundance of gut bacterial composition of parasite-exposed individuals. a) Infants

817 younger than 5 months of age bacterial composition at the genus level. Relative abundance at the class

818 level depending on parasite colonization b) in individuals over 1yo; c) only in infants between 1yo and

819 2yo; and d) only in mothers.

820



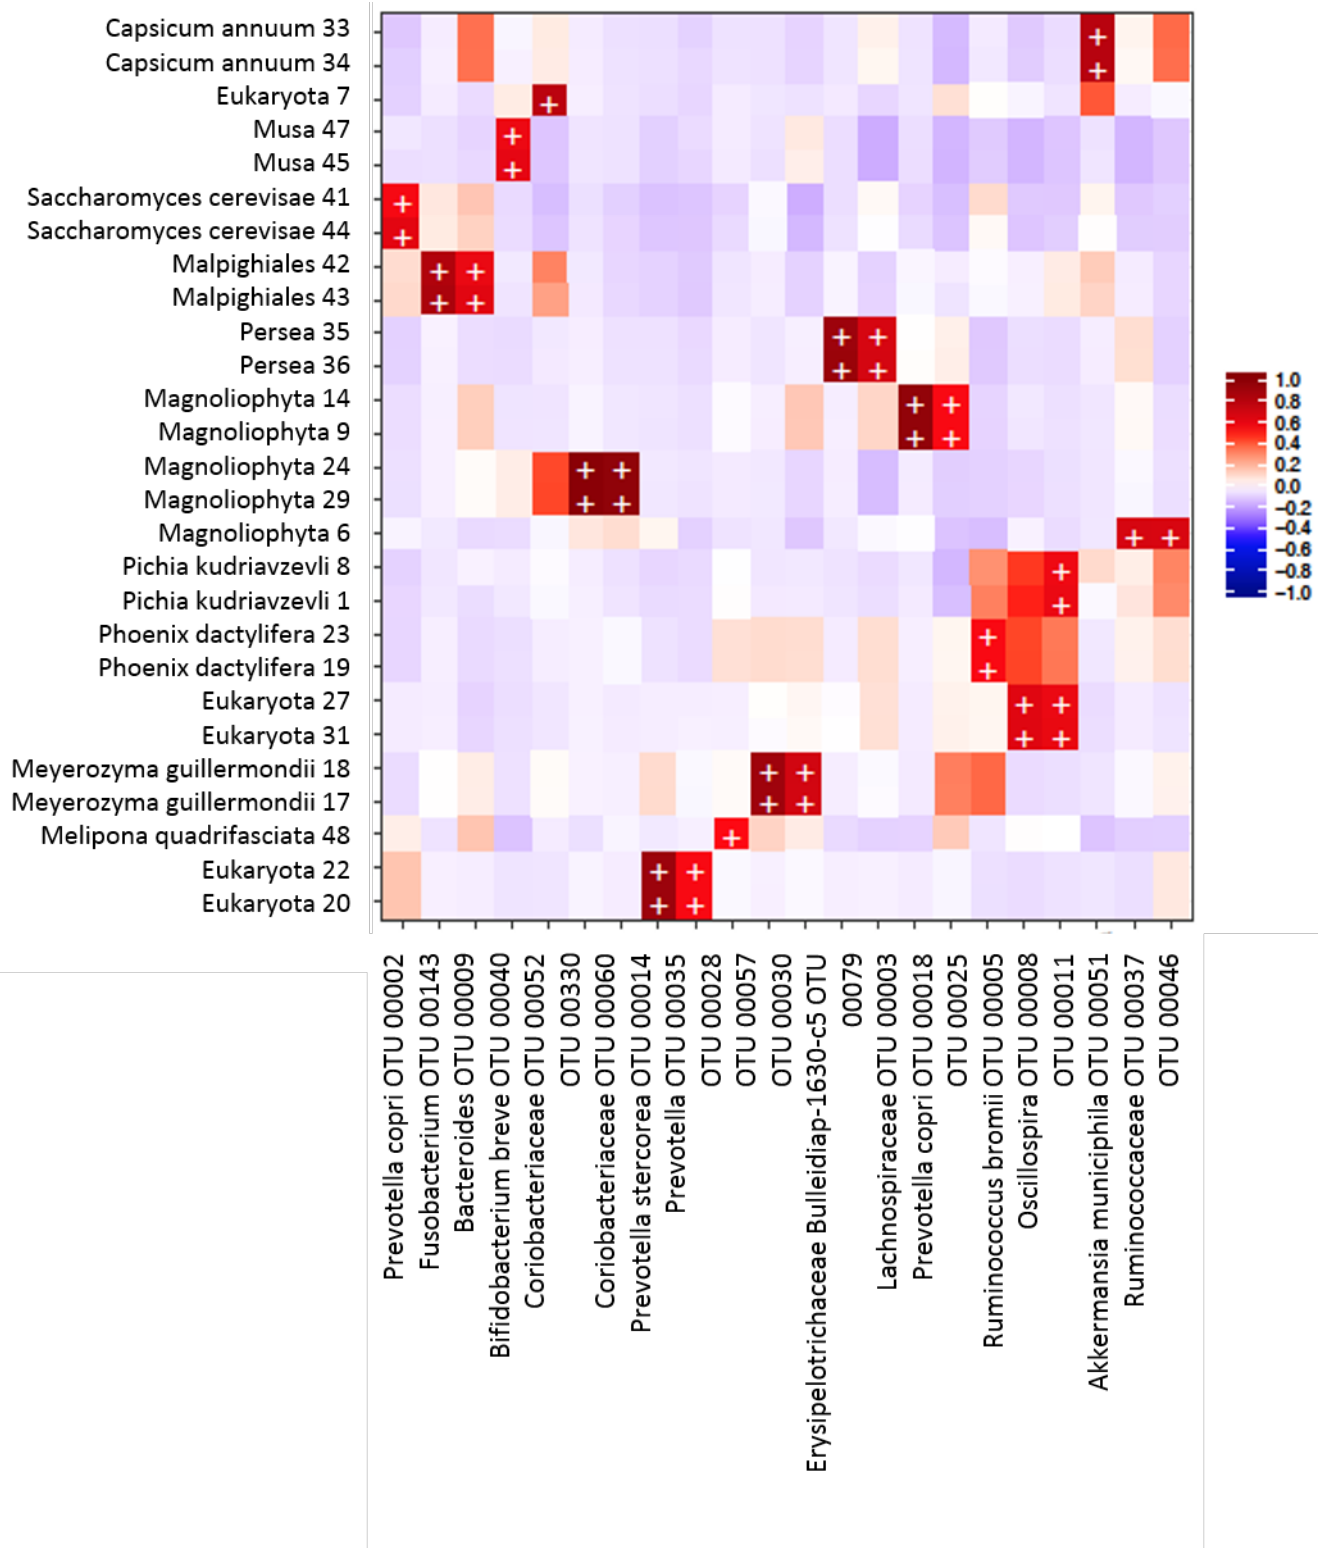

827

828 **FIG. 8** Heatmap of biweight correlations (Pearson) between the top 50 bacterial (x axis) and top 50

829 eukaryote taxon (y axis) OTUs in fecal samples of children (>1yo) and mothers. Colors denote positive

830 (red) and negative (blue) correlation values. Significant correlations are denoted with a plus sign ( $P <$   
831 0.05; FDR).
